# Supplementary material for: Mediation of smoking-associated postoperative mortality by perioperative complications in veterans undergoing elective surgery: data from Veterans Affairs Surgical Quality Improvement Program (VASQIP)—a cohort study
Source: PubMed Central journal article supplement — BMJ Open. 2013 Apr 18;3(4):e002157. doi: 10.1136/bmjopen-2012-002157 (PMC3641431; doi:10.1136/bmjopen-2012-002157), 2013-04-18
Supplement: bmjopen-2012-002157.draft_revisions.pdf [file bmjopen-2012-002157.draft_revisions.pdf]

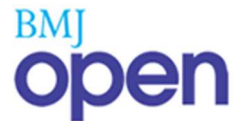

**Mediation of Mortality by perioperative complications in  
Smokers undergoing Surgery: An analysis of Veterans  
Affairs Surgical Quality Improvement Program (VASQIP)**

|                                    |                                                                                                                                                                                                                                                                                                                                                                                                                                                                                                                                       |
|------------------------------------|---------------------------------------------------------------------------------------------------------------------------------------------------------------------------------------------------------------------------------------------------------------------------------------------------------------------------------------------------------------------------------------------------------------------------------------------------------------------------------------------------------------------------------------|
| Journal:                           | <i>BMJ Open</i>                                                                                                                                                                                                                                                                                                                                                                                                                                                                                                                       |
| Manuscript ID:                     | bmjopen-2012-002157                                                                                                                                                                                                                                                                                                                                                                                                                                                                                                                   |
| Article Type:                      | Research                                                                                                                                                                                                                                                                                                                                                                                                                                                                                                                              |
| Date Submitted by the Author:      | 21-Nov-2012                                                                                                                                                                                                                                                                                                                                                                                                                                                                                                                           |
| Complete List of Authors:          | Singh, Jasvinder; Birmingham VA Medical Center,<br>Hawn, Mary; Birmingham VA Medical Center and University of Alabama at<br>Birmingham,<br>Campagna, Elizabeth; University of Colorado Denver, Colorado Health<br>Outcomes Program<br>Henderson, William; University of Colorado Denver, Colorado Health<br>Outcomes Program<br>Richman, Joshua; Birmingham VA Medical Center and University of<br>Alabama at Birmingham,<br>Houston, Thomas; Center for Health Quality Outcomes and Economic<br>Research, Bedford VA Medical Center, |
| <b>Primary Subject<br>Heading</b>: | Health services research                                                                                                                                                                                                                                                                                                                                                                                                                                                                                                              |
| Secondary Subject Heading:         | Rheumatology, Surgery, Smoking and tobacco                                                                                                                                                                                                                                                                                                                                                                                                                                                                                            |
| Keywords:                          | EPIDEMIOLOGY, Rheumatology < INTERNAL MEDICINE, Hip <<br>ORTHOPAEDIC & TRAUMA SURGERY, Knee < ORTHOPAEDIC & TRAUMA<br>SURGERY, Adult orthopaedics < ORTHOPAEDIC & TRAUMA SURGERY,<br>Orthopaedic & trauma surgery < SURGERY                                                                                                                                                                                                                                                                                                           |
|                                    |                                                                                                                                                                                                                                                                                                                                                                                                                                                                                                                                       |

SCHOLARONE™  
Manuscripts

1  
2  
3 **Mediation of Mortality by perioperative complications in Smokers undergoing Surgery:**  
4  
5 **An analysis of Veterans Affairs Surgical Quality Improvement Program (VASQIP)**  
6

7 Jasvinder A. Singh<sup>1,4</sup>, Mary Hawn<sup>1,2</sup>, Elizabeth J. Campagna<sup>5,8</sup>, William G. Henderson<sup>5</sup>, Joshua  
8 Richman<sup>1</sup>, Thomas K. Houston<sup>6,7</sup>  
9

10 From the<sup>1</sup>Medicine Service, Birmingham VA Medical Center and Department of Medicine,  
11 University of Alabama at Birmingham, Birmingham, AL; <sup>2</sup>Center for Surgical Medical Acute Care  
12 Research and Transitions, Birmingham VA Medical Center, Birmingham, AL; <sup>3</sup>Division of  
13 Epidemiology, School of Public Health, University of Alabama at Birmingham, Birmingham, AL;  
14  
15  
16  
17  
18  
19  
20  
21  
22  
23  
24  
25  
26  
27  
28  
29  
30  
31  
32  
33  
34  
35  
36  
37  
38  
39  
40  
41  
42  
43  
44  
45  
46  
47  
48  
49  
50  
51  
52  
53  
54  
55  
56  
57  
58  
59  
60

**Grant support:** This material is the result of work supported with VA IIR IAB 06-038-2 and the use and resources of facilities at the Department of Veterans Affairs Medical Centers at Bedford, Massachusetts; Birmingham, Alabama; and Denver, Colorado. Dr. Singh is supported by research grants from the National Institute of Aging, National Cancer Institute and Agency for Health Quality and Research Center for Education and Research on Therapeutics (CERTs).

**Financial Conflict:** There are no financial conflicts related to this work. Dr. Singh has received investigator-initiated research grants from Allergan, Takeda and Savient; consultant fees from URL pharmaceuticals, Takeda, Savient, Ardea, Allergan and Novartis; and is a member of the executive of OMERACT, an organization that develops outcome measures in rheumatology and receives arms-length funding from 36 companies. Dr. Singh is also a member of the American College of Rheumatology's Guidelines Subcommittee of the Quality of Care Committee and Veterans Affairs Rheumatology Field Advisory Committee. Other authors declare no conflict of interest.

1  
2  
3 Each author certifies that his or her institution has approved the human protocol for this  
4  
5 investigation and that all investigations were conducted in conformity with ethical principles of  
6  
7 research.  
8

9  
10 **Correspondence:** Jasvinder A. Singh, MBBS, MPH, University of Alabama at Birmingham,  
11  
12 Faculty Office Tower 805B, 510 20<sup>th</sup> Street S, Birmingham, AL 35294.

13  
14 Phone: 205-996-5885 Fax : 205-996-9685 E-mail: [Jasvinder.md@gmail.com](mailto:Jasvinder.md@gmail.com)

15  
16 "The views expressed in this article are those of the authors and do not necessarily reflect the  
17  
18 position or policy of the Department of Veterans Affairs or the United States government."  
19

20  
21 Word Count: 3,024

22  
23 Abstract: 246

24  
25 **Keywords:** Smoking, elective surgery, mortality, mediator, Veterans

26  
27 **Running Title:** Mediators of Mortality in Smokers Undergoing Arthroplasty  
28  
29  
30  
31  
32  
33  
34  
35  
36  
37  
38  
39  
40  
41  
42  
43  
44  
45  
46  
47  
48  
49  
50  
51  
52  
53  
54  
55  
56  
57  
58  
59  
60

## Article Summary

### 1) Article Focus -

- We aimed to examine whether smoking-associated post-operative mortality is mediated through smoking-associated postoperative complications in patients who are current smokers at the time of their surgery.
- We hypothesized that specific smoking-associated complications (SSI, pulmonary, cardiovascular) in the post-operative period in current smokers, mediate smoking-related 6-month and 1-year mortality.

### 2) Key Messages -

- Pulmonary complications, followed by cardiovascular and surgical site infection complications were mediators of smoking-associated 6-month and 1-year mortality after elective knee or hip replacement surgery.
- Preoperative smoking counseling and implementation of smoking cessation programs should be done prior to an elective surgery such as knee/hip replacement.
- Early treatment of complications that mediate postoperative 1-year mortality may help to reduce risk of dying after an elective surgery.

### 3) Strengths and Limitations -

#### Strengths:

- Use of prospectively, collected national data in the largest integrated health care system in the U.S.
- Outcomes and complications had been defined using standardized definitions and validated by nurse abstractors

#### Limitations:

- Findings may not be generalizable to women and non-veteran U.S. population, since our sample included primarily men, representative of U.S. veterans.
- The current smoker variable is collected retrospectively from medical records, which could lead to misclassification bias and underestimation of the association.
- Smoking status may change over time and the current study could not take that into account, since ongoing smoking status data are not available.
- Mediation assumes no unmeasured variables and despite accounting for all the important variables to the best of our capability with the given data, residual confounding is possible.

□

**ABSTRACT**

**Objective:** To assess the mediation of smoking-associated post-operative mortality by post-operative complications.

**Design: Observational Cohort Study**

**Setting:** Using data from the Veterans Affairs Surgical Quality Improvement Program, a quality assurance program for major surgical procedures in the VA healthcare system, we assessed the association of current smoking at the time of the surgery with 6-month and 1-year mortality.

**Primary and Secondary Outcome Measures:** Using mediation analyses, we calculated the relative contribution of each smoking-associated complication to smoking-associated postoperative mortality, both unadjusted and adjusted for age, race/ethnicity, work relative value unit of the operation, surgeon specialty, American Society of Anesthesiologists class, and year of surgery. Smoking-associated complications included surgical site infection, cardiovascular complications (myocardial infarction, cardiac arrest, and/or stroke), and pulmonary complications (pneumonia, failure to wean, and/or re-intubation).

**Results:** There were 186,632 never-smokers and 135,741 current smokers. The association of smoking and mortality was mediated by smoking-related complications with varying effects. In unadjusted analyses, the proportions of mediation of smoking to 6-month mortality explained by the complications were as follows: SSI, 22%; cardiovascular complications, 12%; and pulmonary complications, 89%. In adjusted analyses, the percents mediated by each complication were as follows: SSI, 2%; cardiovascular complications, 4%; and pulmonary complications, 22%. In adjusted analyses for 1-year mortality, respective percents mediated were 2%, 3% and 16%.

**Conclusions:** Pulmonary complications, followed by cardiovascular and SSI complications were mediators of smoking-associated 6-month and 1-year mortality. Interventions targeting smoking cessation and prevention and early treatment of pulmonary complications has the likelihood of reducing post-operative mortality after elective surgery.

**Trial Registration:** Not applicable, not an interventional study

For peer review only

1  
2  
3  
4  
5  
6  
7  
8  
9  
10  
11  
12  
13  
14  
15  
16  
17  
18  
19  
20  
21  
22  
23  
24  
25  
26  
27  
28  
29  
30  
31  
32  
33  
34  
35  
36  
37  
38  
39  
40  
41  
42  
43  
44  
45  
46  
47  
48  
49  
50  
51  
52  
53  
54  
55  
56  
57  
58  
59  
60

## INTRODUCTION

Smoking is the leading cause of preventable death in the U.S. (1, 2). While the prevalence of smoking in the U.S. has decreased (3), smoking is still highly prevalent with a recent national survey showing between 10-26% prevalence in most U.S. states (4). The prevalence of smoking in veterans using Veterans Affairs (VA) health care is even higher, at 30% (5). Smoking has detrimental effects on cardiovascular and lung health, and is linked to increased risk of surgical complications. Specifically, smokers undergoing surgery have a higher risk of several postoperative complications including wound infections, pneumonia, and mortality (6, 7). Smoking is a modifiable risk factor (8-10). Preoperative smoking cessation is associated with decreased postoperative wound complications and total complications (11).

While smoking-related postoperative morbidity is important, smoking is also associated with increased post-operative mortality (12-14). There are several proposed mechanisms of increased mortality in the perioperative period for smokers, including higher risk of cardiac (12, 13) and pulmonary complications (14). To our knowledge, no previous studies have assessed to what degree the increased smoking-associated postoperative mortality is mediated by specific complications associated with smoking. This has important consequences for designing interventions to improve outcomes. If the effect of smoking on mortality were direct, then the only method to improve smoking-related outcomes would be smoking cessation. Alternatively, if smoking were related to mortality through an increase in pulmonary complications among smokers, then the effect of smoking is said to act through the mediating factor of pulmonary complications. Such a result would suggest that direct actions to reduce pulmonary complications among smokers may be an alternative method for improving the mortality outcome.

We have recently demonstrated that smoking was associated with both postoperative surgical site infections (SSI) and pulmonary complications in a large cohort of veterans who underwent surgery in VA medical facilities and that mortality was also increased in this cohort



1  
2  
3 (15). These data are collected prospectively and systematically as part of the National VA  
4  
5 Surgical Quality Improvement Program (VASQIP) (16) (17).  
6

7  
8 In this study we aimed to examine whether smoking-associated post-operative mortality  
9  
10 is mediated through smoking-associated postoperative complications in patients who are  
11  
12 current smokers at the time of their surgery. Conceptually, “mediation” occurs when a cause  
13  
14 and its effect are linked through an intervening factor that is part of the causal chain of events  
15  
16 (18). As an example, this study explored the link between smoking and postoperative morbidity  
17  
18 and mortality. We hypothesized that specific smoking-associated complications (SSI,  
19  
20 pulmonary, cardiovascular) in the post-operative period in current smokers, mediate smoking-  
21  
22 related 6-month and 1-year mortality. This was done in two steps, i.e., once a link was  
23  
24 established between smoking and adverse outcomes, we investigated whether the effect was  
25  
26 directly due to smoking itself or whether it acts through a mediator, in this case, smoking-  
27  
28 associated complication.  
29  
30  
31  
32  
33  
34  
35  
36  
37  
38  
39  
40  
41  
42  
43  
44  
45  
46  
47  
48  
49  
50  
51  
52  
53  
54  
55  
56  
57  
58  
59  
60

## METHODS

### Ethical Approval, Study Funding and Data sharing

The study was approved by the Institutional Review Boards at the VA Medical Centers (Birmingham, AL, Bedford, MA, Boston, MA and Seattle, WA), the University of Colorado, and by the Surgical Quality Data Use Group of VA Patient Care Services in VA Central Office, Washington, DC (as needed for studies using data from this dataset). All analyses used SAS version 9.2 (SAS Institute Inc., Cary, North Carolina). This material is the result of work supported with VA Investigator-Initiated Research (IIR) IAB 06-038-2. Additionally, Dr. Singh's time was protected by research grants from the National Institute of Aging, National Cancer Institute and Agency for Health Quality and Research Center for Education and Research on Therapeutics (CERTs). We are committed to sharing the data with colleagues after an ethics committee approval and in accordance with VA data privacy and data security rules.

### Study Sample

We used data from the VASQIP, a system-wide initiative instituted in 1994 to improve the quality of surgical care through prospective collection and reporting of comparative risk-adjusted post-operative outcomes of major surgeries requiring general, spinal, or epidural anesthesia(19). The abstracted data are >99% complete with >96% inter-observer agreement(17). We requested all cases in major procedure groups defined by CPT codes within each of the 8 surgical subspecialties (general, vascular, orthopedic, thoracic, otolaryngology, urology, neurosurgery, and plastic surgery) for the years 2002-2008. This produced a sample of roughly 60-70% of all non-cardiac operations in the VASQIP database for those years (n=507,545). We selected the first operation for each patient greater than or equal to 19 years of age, resulting in 412,511 unique patients. We excluded 17,202 patients coded as having emergency operations, since we wanted to focus on elective surgeries. We also excluded 1,515 patients who were coded as a current smoker but who had 0 pack-years (an

1  
2  
3 inconsistency) or were missing the current smoker variable. Since our focus was current  
4 smoking, we excluded 71,421 prior smokers leaving a total of 322,373 patients for analysis.  
5  
6  
7  
8

#### 9 10 Independent Measure: Current Smoking

11 Smoking status was assessed using two variables. Patients are queried at the time of  
12 elective surgery if they have smoked cigarettes in the year prior to admission (yes/no) and  
13 regarding amount of smoking (pack years = the number of packs smoked per day multiplied by  
14 the number of years the patient smoked), documented in patients' medical records. Never-  
15 smokers were patients who had no smoking in the prior year and zero (or missing) pack years.  
16 Current smokers were those who responded "yes" to smoking in the year prior to admission and  
17 had pack years not equal to zero.  
18  
19  
20  
21  
22  
23  
24  
25  
26  
27  
28

#### 29 Dependent Measure: Mortality

30 Mortality was assessed at 6-months and at 1-year. The VASQIP nurses collect 30-day  
31 postoperative vital status for all patients assessed in the VASQIP program. Once every 6  
32 months, the VASQIP database is passed through the VA administrative vitals file to obtain data  
33 on long-term postoperative mortality beyond 30 days after surgery.  
34  
35  
36  
37  
38  
39  
40  
41

#### 42 Mediation Variables: 30-day Outcomes for Complications

43 All complications of interest were assessed 30-days after elective surgery. Specifically,  
44 the outcomes included: (1) SSI; (2) Cardiovascular complication, defined as occurrence of  
45 myocardial infarction (MI), cardiac arrest, and/or stroke; (3) Pulmonary complication, defined as  
46 occurrence of pneumonia, failure to wean, and/or re-intubation; and (4) Overall composite  
47 outcome, defined as the occurrence of SSI, cardiovascular and/or pulmonary complication. All  
48 outcomes have standard definitions in VASQIP and are extracted and validated for each patient  
49  
50  
51  
52  
53  
54  
55  
56  
57  
58  
59  
60

1  
2  
3 by an independent nurse abstractor at each VA site for the 30-day period after the surgery (16,  
4  
5 17).

### 6 7 8 9 10 Covariates: Patient, Surgeon, and Procedural Characteristics

11  
12 Patient characteristics including age, race/ethnicity, American Society of  
13  
14 Anesthesiologists (ASA) class, year of surgery, work relative value unit (RVU) for the operation,  
15  
16 and wound classification were extracted. ASA class is a validated measure of peri-operative  
17  
18 mortality and immediate post-operative morbidity, categorized into five classifications (20, 21)  
19  
20 (class I, normal healthy patient; class II, patient with mild systemic disease (with no functional  
21  
22 limitation); class III, patient with severe systemic disease (with some functional limitation); class  
23  
24 IV, patient with severe systemic disease that is a constant threat to life; class V, moribund  
25  
26 patient). Work RVU (a measure of procedure duration and complexity) and surgeon  
27  
28 subspecialty were collected by chart review.  
29  
30  
31  
32

### 33 Statistical Analyses

34  
35 Summary statistics were calculated for clinical and demographic characteristics.  
36  
37 Mediation analysis was done without and with controlling for covariates that could potentially  
38  
39 confound the relationship. Univariable and multivariable-adjusted logistic regression analyses  
40  
41 were used to compute coefficients for association of smoking and mortality, smoking and major  
42  
43 complications (SSI, pulmonary, cardiovascular or composite) and major complications and  
44  
45 mortality, to assess mediation effect of complications on the relationship between smoking and  
46  
47 mortality. In multivariable analyses, we adjusted for age, race/ethnicity, work RVU, surgeon  
48  
49 specialty, ASA class, and year at each step of the mediation analysis. Wound classification was  
50  
51 additionally adjusted for in the model when assessing the mediation effect of SSI.  
52  
53  
54

55 The conceptual framework of “mediation” indicates that mediation occurs when a cause  
56  
57 and its effect are linked through an intervening factor that is part of the causal chain of events  
58  
59  
60

1  
2  
3 (18). The classic exposition of statistical mediation analysis was given by Baron and Kenny in  
4  
5 1986 (18). The mediating relationship was conceived in causal terms, so while it was  
6  
7 recognized that the statistical models cannot establish causality, the causal interpretation of the  
8  
9 posited relationships must be plausible. The precondition was that the independent variable  
10  
11 (smoking) is statistically significantly associated with the dependent variable (e.g. 6-month  
12  
13 mortality). The total effect of smoking on mortality was denoted by the path “c” in figure 1  
14  
15 representing the effect of smoking on mortality without adjustment for the potential mediator.  
16  
17 Baron and Kenny outlined three steps for a formal mediation analysis using regression, which  
18  
19 can be explained with reference to figure 1 in the context of the relationship between smoking  
20  
21 and 6-month mortality with the putative mediating effect of pulmonary complications. The first  
22  
23 step was to establish that there is a significant association between the independent variable  
24  
25 (smoking) and the potential mediator (pulmonary complications) corresponding to the path  
26  
27 coefficient “a” in figure 1. The second step was to establish that the potential mediator  
28  
29 (pulmonary complications) is associated with the dependent variable (6-month mortality), while  
30  
31 controlling for the independent variable (smoking), corresponding to the path coefficient “b”.  
32  
33 Last, when controlling for the mediator (pulmonary complications) the “direct effect” of the  
34  
35 independent variable (smoking) on the dependent variable (6-month mortality) corresponds to  
36  
37 the coefficient “c’ “. Less technically, if 1) smoking was related to both pulmonary complications  
38  
39 and mortality, 2) pulmonary complications were related to mortality, and 3) the relationship  
40  
41 between smoking and mortality was significantly smaller when controlling for pulmonary  
42  
43 complications, then there was a significant amount of mediation by pulmonary complications.  
44  
45  
46  
47  
48

49         Arithmetically, the indirect effect is equal to the product of coefficients  $a*b$  and the total  
50  
51 effect (c), is equal to the indirect effect ( $a*b$ ) plus the remaining direct effect ( $c'$ ), thus:  $c=a*b + c'$ ,  
52  
53 so  $c'=c-a*b$ . Clearly, as the indirect effect through the mediator gets larger, the residual direct  
54  
55 effect must decrease, implying that a larger part of the effect is via the mediator. The more the  
56  
57 direct effect is diminished, the greater part of the effect is mediated. In our work, the  
58  
59  
60

1  
2  
3 independent, dependent, and mediator variable were all dichotomous. For this situation,  
4  
5 logistic regression was used and coefficients must then be standardized to the same scale prior  
6  
7 to comparison and statistical testing as presented by MacKinnon and Dwyer (22). When using  
8  
9 logistic regression, unlike in multiple regression,  $a*b+c'$  only approximated  $c$ . In this work, we  
10  
11 reported the proportion of the effect mediated as  $(a*b)/(a*b+c')$ , or the indirect effect divided by  
12  
13 the total effect. The statistical significance of the mediated, or indirect, effect was determined by  
14  
15 testing whether the product  $a*b$  is statistically different from zero. The standard approximate test  
16  
17 was due to the work of Sobel, and presented by Baron and Kenny (18). Subsequent work,  
18  
19 notably by Shrouf and Bolger,(23) note that the Sobel test can be overly conservative for small  
20  
21 samples but also that this ceases to be a concern when the sample size is greater than 1,000.  
22  
23 The much larger sample size of this study suggested that the Sobel test was adequate in this  
24  
25 context.  
26  
27  
28  
29  
30  
31  
32  
33  
34  
35  
36  
37  
38  
39  
40  
41  
42  
43  
44  
45  
46  
47  
48  
49  
50  
51  
52  
53  
54  
55  
56  
57  
58  
59  
60

## RESULTS

There were 186,632 never-smokers and 135,741 current smokers. The mean age was 63 years for never smokers and 58 years for current smokers. 95% were men and 63% were White (race/ethnicity missing in 19%) (**Table 1**). Diabetes was less common among current smokers compared to never smokers, but COPD, dyspnea, and alcohol consumption were more common. Other characteristics were similar between the two groups (Table 1).

### Mediation Analyses for 6-month and 1-year mortality

Unstandardized coefficients were calculated without (unadjusted; **Table 2**) and with (adjusted; **Table 3**) potential confounders using regression analyses. Variances for computing standardized coefficients are footnoted. The unadjusted coefficients were highest between smoking and pulmonary complications (coefficient  $a = 0.46$ ), and between pulmonary complication and 6-month mortality, controlling for smoking was (coefficient  $b = 2.90$ ) among all complications (**Table 2**); similar observations were made for pulmonary complications and 1-year mortality. In general unadjusted coefficients were higher than adjusted coefficients.

**Table 3** provides coefficients for the mediation analyses controlling for confounding from age, race/ethnicity, work RVU, surgeon specialty, ASA class, and year for 6-month and 1-year mortality. Mediation analysis for SSI additionally controlled for wound classification. The coefficients for the path from smoking to 6- and 12-month mortality when considering the mediation factor of SSI were 0.39 and 0.45 (coefficient  $c$ ). Again as an example, the coefficient between smoking and pulmonary complications was 0.48 (coefficient  $a$ ), between pulmonary complication and 6-month mortality controlling for smoking was 2.17 (coefficient  $b$ ), and that between smoking and 6-month mortality controlling for pulmonary complication was 0.32 (coefficient  $c'$ ). The association between smoking and 6-month mortality was significantly mediated by pulmonary complication (22%). For 6-month mortality, adjusted coefficients between smoking and complications were highest for pulmonary complications (0.48), followed

1  
2  
3 by composite outcome (0.29), SSI (0.19) and cardiovascular complications (0.19) (coefficient a).  
4  
5 Adjusted coefficients were highest for pulmonary followed by cardiovascular, composite and SSI  
6  
7 complications for association with 6-month mortality, controlling for smoking (coefficient b). The  
8  
9 proportion of mediation of smoking to 6-month mortality explained by the complications in  
10  
11 adjusted analyses was 16% for the composite outcome, while the proportions were lower for  
12  
13 SSI (2%) and cardiovascular complications (4%) (**Table 4**).

14  
15  
16 Similar patterns were noted for mediation of smoking and 1-year mortality for adjusted  
17  
18 coefficients (**Table 3**). In the adjusted models, the proportion of mediation of smoking to 1-year  
19  
20 mortality explained by the complications in adjusted analyses was 16% for pulmonary  
21  
22 complications, 11% for composite complications, 3% for cardiovascular complications and 2%  
23  
24 for SSI (**Table 4**).



## DISCUSSION

1  
2  
3  
4  
5  
6  
7  
8  
9  
10  
11  
12  
13  
14  
15  
16  
17  
18  
19  
20  
21  
22  
23  
24  
In this analysis of prospectively collected data in a national sample of non-cardiac elective surgeries at VA facilities, we found that increased 6-month and 1-year smoking-associated mortality was mediated by pulmonary complications and to a lesser extent cardiovascular complications and surgical site infections. Not unexpectedly, the proportion of smoking-mortality association mediated by these peri-operative complications was greater for 6-month mortality compared to that for 1-year mortality. The proportion mediated by complications also attenuated significantly between adjusted and unadjusted analyses, as expected. These observations are novel and have important implications for targeting interventions for patients undergoing elective surgery.

25  
26  
27  
28  
29  
30  
31  
32  
33  
34  
35  
36  
37  
38  
39  
40  
41  
42  
43  
44  
45  
46  
47  
48  
49  
50  
51  
52  
53  
54  
55  
56  
57  
58  
59  
60  
That smoking is associated with increased mortality after elective surgical procedures is well known. This study examined a critical question, i.e., is this increased mortality mediated by the postoperative complications seen more commonly in smokers than in non-smokers? The evidence presented here confirms that these postoperative complications mediated significant proportion of increased mortality risk, and that this varies by the type of complication. Pulmonary complications explained the most variation in this increased risk, as compared to cardiovascular complications or surgical site infections. Our findings suggest pulmonary complications are far more important contributors to the smoking-mortality association than the cardiovascular complications. There has been significant emphasis placed on pre-operative cardiac risk assessment for non-cardiac surgery (24). Consensus statements on cardiac risk stratification including who should undergo screening and revascularization and management of patients with implanted cardiac stents have been developed and widely disseminated (25-27). Perhaps this focus and attention on identifying and intervening on cardiac risk has mitigated effects of smoking related cardiovascular events on mortality. Similar attention has not been given to pre-operative risk stratification for post-operative pulmonary events. These events

1  
2  
3 occur more frequently than cardiovascular events and lead to substantial post-operative  
4 mortality (28-33).  
5  
6

7  
8 Perioperative complications associated with smoking mediated a high proportion of the  
9 association of smoking and mortality before adjustment. But the proportion mediation was  
10 greatly attenuated after adjustment. This suggests that a major part of the mediation effect was  
11 contained in variables we adjusted for, including ASA class. In addition, some of the  
12 association of smoking and subsequent mortality is related to lifetime exposure to smoking, and  
13 not the direct effect of smoking on perioperative complications. This may be related to  
14 occurrence of major lifetime complications from smoking, for example, COPD, coronary artery  
15 disease, various cancers and stroke, which can all contribute to postoperative mortality.  
16  
17  
18  
19  
20  
21  
22  
23

24  
25 We did find that even after adjustment, smoking-related pulmonary complications  
26 mediated over 15% of the association of smoking and postoperative mortality. Thus, part of the  
27 effect of smoking on mortality is a lifetime exposure effect, and part due to immediate  
28 complications, such as pulmonary complications. The first goal should always be to get  
29 smokers to quit prior to surgery. But acknowledging that not all smokers will quit prior to their  
30 surgery, the surgical staff should be especially vigilant of pulmonary complications, as our data  
31 clearly demonstrates them to mediate mortality. Careful monitoring of adherence to pneumonia  
32 prevention guidelines in postoperative period as well as early diagnosis and management may  
33 lead to reduction in mortality. Far more importantly, preventive pre-operative evaluation and  
34 optimization of pulmonary health in addition to implementation of preoperative smoking  
35 cessation programs in patients undergoing elective surgery have the likelihood of reducing the  
36 increased mortality risk. Consensus statements on pulmonary risk assessment and patients  
37 who should be referred for intervention are strongly needed.  
38  
39  
40  
41  
42  
43  
44  
45  
46  
47  
48  
49  
50  
51  
52

53 We found that attributable risk of SSI to smoking-related mortality was lower than that for  
54 pulmonary and cardiovascular complications. SSIs constitute the most common infection,  
55 accounting for 38% of all infections (6). In addition, SSIs are associated with significant  
56  
57  
58  
59  
60

1  
2  
3 increases in hospital stay,(6) making them one of the most costly post-operative  
4 complications.(6, 34). SSIs are the third most common nosocomial infection overall,  
5 representing 14% of all hospital acquired infections. Thus even though their contribution to  
6 mortality is lower, their common prevalence and the ability to institute measures to prevent them  
7 make them suitable targets for interventions.  
8  
9

10  
11  
12  
13  
14 Our study has several limitations. It is possible that findings may not be generalizable to  
15 women, since our sample included primarily men, representative of U.S. veterans. These  
16 findings may not be generalizable to non-veterans; however, it is unlikely that the pathway of  
17 smoking-associated mortality risk differs by veteran status. The current smoker variable in  
18 VASQIP is collected retrospectively from medical records, which could lead to misclassification  
19 bias and underestimation of the association. Thus, these results are conservative estimates of  
20 these associations. Another limitation is that smoking status may change over time and current  
21 study design and analyses did not take that into account. Mediation assumes no unmeasured  
22 variables; this is of course not true as we can never account for all omitted factors. We  
23 accounted for all the important variables to the best of our capability with the given data.  
24  
25  
26  
27  
28  
29  
30  
31  
32  
33  
34  
35

36 In conclusion, this study found that a high proportion of association between smoking  
37 and post-operative 6-month and 1-year mortality is mediated by postoperative complications,  
38 especially pulmonary complications. Future efforts at reducing post-operative mortality should  
39 be aimed at pre-operative risk identification and intervention. Efforts directed at pulmonary risk  
40 stratification, surveillance and prevention for pulmonary and other complications in smokers  
41 undergoing elective surgery may likely impact mortality in current smokers undergoing elective  
42 surgical procedures.  
43  
44  
45  
46  
47  
48  
49  
50  
51  
52  
53  
54  
55  
56  
57  
58  
59  
60

1  
2  
3  
4  
5  
6  
7  
8  
9  
10  
11  
12  
13  
14  
15  
16  
17  
18  
19  
20  
21  
22  
23  
24  
25  
26  
27  
28  
29  
30  
31  
32  
33  
34  
35  
36  
37  
38  
39  
40  
41  
42  
43  
44  
45  
46  
47  
48  
49  
50  
51  
52  
53  
54  
55  
56  
57  
58  
59  
60

**ACKNOWLEDGMENT**

The authors would like to acknowledge The VA Surgical Quality Data Use Group (SQDUG) for its role as scientific advisors and for the critical review of data use and analysis presented in this manuscript.

For peer review only

## TABLES AND FIGURES

**Table 1.** Patient characteristics by smoking status (Column percents unless noted otherwise)

| Characteristic                | Never<br>Smoked<br>(n=186,632) | Current<br>Smoker<br>(n=135,741) |
|-------------------------------|--------------------------------|----------------------------------|
| Smoking Pack Years, mean (SD) | N/A                            | 48.8 (32.6)                      |
| Demographics                  |                                |                                  |
| Age, mean (SD)                | 63.1 (13.7)                    | 57.6 (11.0)                      |
| Sex                           | Female                         | 5.1%                             |
|                               | Male                           | 94.9%                            |
| Race/Ethnicity                | White                          | 62.3%                            |
|                               | Black                          | 12.3%                            |
|                               | Hispanic                       | 5.3%                             |
|                               | Other/Unknown                  | 20.2%                            |
| Comorbidities                 |                                |                                  |
| Diabetes                      | 20.2%                          | 14.6%                            |
| Congestive heart failure      | 1.2%                           | 1.0%                             |
| History of severe COPD        | 7.0%                           | 18.4%                            |
| Dyspnea                       | 8.4%                           | 15.4%                            |
| Chronic Corticosteroid use    | 1.7%                           | 1.7%                             |
| Renal failure/Dialysis        | 0.7%                           | 0.5%                             |
| CVA/Stroke                    | 5.9%                           | 6.6%                             |
| Transient ischemic attacks    | 2.9%                           | 3.6%                             |

|    |                                        |                     |       |       |
|----|----------------------------------------|---------------------|-------|-------|
| 1  |                                        |                     |       |       |
| 2  |                                        |                     |       |       |
| 3  |                                        |                     |       |       |
| 4  | Functional health status               | Independent         | 93.5% | 94.8% |
| 5  |                                        | Partially dependent | 5.2%  | 4.6%  |
| 6  |                                        | Totally dependent   | 1.3%  | 0.6%  |
| 7  |                                        |                     |       |       |
| 8  |                                        |                     |       |       |
| 9  |                                        |                     |       |       |
| 10 | >10% loss body weight in past 6 months |                     | 1.8%  | 3.4%  |
| 11 |                                        |                     |       |       |
| 12 | Disseminated cancer                    |                     | 1.0%  | 1.3%  |
| 13 |                                        |                     |       |       |
| 14 | Open wound/wound infection             |                     | 3.2%  | 4.3%  |
| 15 |                                        |                     |       |       |
| 16 | DNR status                             |                     | 0.9%  | 0.6%  |
| 17 |                                        |                     |       |       |
| 18 | Alcohol > 2 drinks/day                 |                     | 4.3%  | 14.6% |
| 19 |                                        |                     |       |       |
| 20 |                                        |                     |       |       |
| 21 | Operative Characteristics              |                     |       |       |
| 22 |                                        |                     |       |       |
| 23 | Anesthesia technique                   | General             | 79.4% | 84.8% |
| 24 |                                        | Epidural/Spinal     | 15.6% | 10.9% |
| 25 |                                        | Local/Monitored     | 5.1%  | 4.2%  |
| 26 |                                        |                     |       |       |
| 27 |                                        |                     |       |       |
| 28 |                                        |                     |       |       |
| 29 | ASA classification                     | 1                   | 4.4%  | 1.6%  |
| 30 |                                        | 2                   | 35.8% | 33.4% |
| 31 |                                        | 3                   | 53.8% | 58.2% |
| 32 |                                        | 4/5                 | 6.1%  | 6.8%  |
| 33 |                                        |                     |       |       |
| 34 |                                        |                     |       |       |
| 35 |                                        |                     |       |       |
| 36 |                                        |                     |       |       |
| 37 |                                        |                     |       |       |
| 38 | Admission status                       | Outpatient          | 51.0% | 47.1% |
| 39 |                                        | Inpatient           | 49.0% | 52.9% |
| 40 |                                        |                     |       |       |
| 41 |                                        |                     |       |       |
| 42 | Specialty of Surgeon                   | General Surgery     | 39.3% | 35.3% |
| 43 |                                        | Neurosurgery        | 5.4%  | 7.9%  |
| 44 |                                        | Orthopedic Surgery  | 29.6% | 21.9% |
| 45 |                                        | Otolaryngology      | 1.1%  | 1.3%  |
| 46 |                                        | Plastic Surgery     | 0.6%  | 0.6%  |
| 47 |                                        | Thoracic Surgery    | 1.7%  | 5.6%  |
| 48 |                                        | Urology             | 15.6% | 13.1% |
| 49 |                                        |                     |       |       |
| 50 |                                        |                     |       |       |
| 51 |                                        |                     |       |       |
| 52 |                                        |                     |       |       |
| 53 |                                        |                     |       |       |
| 54 |                                        |                     |       |       |
| 55 |                                        |                     |       |       |
| 56 |                                        |                     |       |       |
| 57 |                                        |                     |       |       |
| 58 |                                        |                     |       |       |
| 59 |                                        |                     |       |       |
| 60 |                                        |                     |       |       |

|                                  |                    |            |            |
|----------------------------------|--------------------|------------|------------|
|                                  | Cardiovascular     | 6.3%       | 13.8%      |
|                                  | Surgery            |            |            |
|                                  | Other              | 0.4%       | 0.4%       |
| Wound Classification             | Clean              | 70.0%      | 70.8%      |
|                                  | Clean/contaminated | 27.3%      | 26.2%      |
|                                  | Contaminated       | 1.6%       | 1.6%       |
|                                  | Infected           | 1.2%       | 1.4%       |
| Work RVU (mean, SD)              |                    | 14.1 (7.1) | 14.8 (7.8) |
| Operation time, hours (mean, SD) |                    | 1.9 (1.4)  | 2.1 (1.6)  |

All p-value are less than 0.001 with the exception of steroid use, for which was 0.581

N/A, not applicable; SD, standard deviation; RUV, relative value units; ASA, American Society of Anesthesiologists; DNR, Do not resuscitate; COPD, chronic obstructive pulmonary disease; CVA, cerebrovascular accident

**Table 2.** Unadjusted coefficients<sup>a</sup> and their 95% confidence intervals

| Outcome                        | Mediator                     | c    | 95% CI    | a    | 95% CI    | b    | 95% CI    | c'   | 95% CI     |
|--------------------------------|------------------------------|------|-----------|------|-----------|------|-----------|------|------------|
| 6-month mortality <sup>b</sup> | Surgical site infection      | 0.12 | 0.08-0.15 | 0.37 | 0.33-0.41 | 0.89 | 0.81-0.96 | 0.10 | 0.07-0.14  |
|                                | Cardiovascular complications | 0.12 | 0.08-0.15 | 0.15 | 0.05-0.24 | 2.70 | 2.60-2.80 | 0.11 | 0.07-0.15  |
|                                | Pulmonary complications      | 0.12 | 0.08-0.15 | 0.46 | 0.42-0.51 | 2.90 | 2.85-2.95 | 0.01 | -0.02-0.05 |
|                                | Composite outcome            | 0.12 | 0.08-0.15 | 0.39 | 0.36-0.42 | 2.21 | 2.17-2.25 | 0.02 | -0.02-0.05 |
| 1-year mortality <sup>c</sup>  | Surgical site infection      | 0.20 | 0.17-0.23 | 0.37 | 0.33-0.41 | 0.83 | 0.76-0.89 | 0.19 | 0.16-0.22  |
|                                | Cardiovascular complications | 0.20 | 0.17-0.23 | 0.15 | 0.05-0.24 | 2.42 | 2.32-2.52 | 0.20 | 0.17-0.23  |
|                                | Pulmonary complications      | 0.20 | 0.17-0.23 | 0.46 | 0.42-0.51 | 2.60 | 2.57-2.64 | 0.13 | 0.10-0.17  |
|                                | Composite outcome            | 0.20 | 0.17-0.23 | 0.39 | 0.36-0.42 | 1.91 | 1.88-1.95 | 0.13 | 0.10-0.16  |



---

c=direct path from smoking to mortality

a= path from smoking to complication (SSI, cardiovascular, pulmonary or composite)

b= path from complication (SSI etc.) to mortality controlling for smoking

c' = path from smoking to mortality controlling for complication (SSI etc.)

<sup>a</sup> all coefficients were unstandardized and rounded off to 2-digits after the decimal

<sup>b</sup> Variances used to compute standardized coefficients (22): var (Smoking) = 0.975, var (Mortality) = 0.036, var(predicted Mortality|Smoking') = 3.30, var (SSI) = 0.028, var (predicted SSI|Smoking') = 3.42, var (predicted Mortality|Smoking & SSI'') = 3.32, var (Cardiovascular) = 0.005, var (predicted Cardiovascular|Smoking') = 3.31, var (predicted Mortality|Smoking & Cardiovascular'') = 3.34, var (Pulmonary) = 0.024, var (predicted Pulmonary|Smoking') = 3.50, var (predicted Mortality|Smoking & Pulmonary'') = 3.49, var (Composite) = 0.051, var (predicted Composite|Smoking') = 3.44, var (predicted Mortality|Smoking & Composite'') = 3.54

<sup>c</sup> Variances used to compute standardized coefficients (22): var (Smoking) = 0.975, var (Mortality) = 0.054, var(predicted Mortality|Smoking') = 3.33, var (SSI) = 0.028, var (predicted SSI|Smoking') = 3.42, var (predicted Mortality|Smoking & SSI'') = 3.34, var (Cardiovascular) = 0.005, var (predicted Cardiovascular|Smoking') = 3.31, var (predicted Mortality|Smoking & Cardiovascular'') = 3.36, var (Pulmonary) = 0.024, var (predicted Pulmonary|Smoking') = 3.50, var (predicted Mortality|Smoking & Pulmonary'') = 3.47, var (Composite) = 0.051, var (predicted Composite|Smoking') = 3.44, var (predicted Mortality|Smoking & Composite'') = 3.49

**Table 3.** Adjusted coefficients<sup>a</sup> and their 95% confidence intervals controlling for confounding

| Outcome                        | Mediator                     | c    | 95% CI    | a    | 95% CI    | b    | 95% CI    | c'   | 95% CI    |
|--------------------------------|------------------------------|------|-----------|------|-----------|------|-----------|------|-----------|
| 6-month mortality <sup>b</sup> | Surgical site infection      | 0.39 | 0.35-0.44 | 0.19 | 0.14-0.24 | 0.45 | 0.37-0.53 | 0.39 | 0.35-0.43 |
|                                | Cardiovascular complications | 0.38 | 0.34-0.42 | 0.19 | 0.08-0.30 | 2.00 | 1.89-2.12 | 0.38 | 0.34-0.42 |
|                                | Pulmonary complications      | 0.38 | 0.34-0.42 | 0.48 | 0.43-0.54 | 2.17 | 2.11-2.23 | 0.32 | 0.27-0.36 |
|                                | Composite outcome            | 0.38 | 0.34-0.42 | 0.29 | 0.25-0.32 | 1.71 | 1.66-1.76 | 0.33 | 0.28-0.37 |
| 1-year mortality <sup>c</sup>  | Surgical site infection      | 0.45 | 0.42-0.49 | 0.19 | 0.14-0.24 | 0.44 | 0.37-0.51 | 0.45 | 0.41-0.48 |
|                                | Cardiovascular complications | 0.44 | 0.40-0.47 | 0.19 | 0.08-0.30 | 1.77 | 1.66-1.88 | 0.44 | 0.40-0.47 |
|                                | Pulmonary complications      | 0.44 | 0.40-0.47 | 0.48 | 0.43-0.54 | 1.90 | 1.85-1.96 | 0.39 | 0.36-0.43 |

|                   |      |           |      |           |      |           |      |           |
|-------------------|------|-----------|------|-----------|------|-----------|------|-----------|
| Composite outcome | 0.44 | 0.40-0.47 | 0.29 | 0.25-0.32 | 1.44 | 1.40-1.48 | 0.40 | 0.36-0.44 |
|-------------------|------|-----------|------|-----------|------|-----------|------|-----------|

c=direct path from smoking to mortality controlling for age, race/ethnicity, work RVU, surgeon specialty, ASA class, and year

a= path from smoking to complication (SSI, cardiovascular, pulmonary or composite) controlling for age, race/ethnicity, work RVU, surgeon specialty, ASA class, and year

b= path from complication (SSI etc.) to mortality controlling for smoking, age, race/ethnicity, work RVU, surgeon specialty, ASA class, and year

c' = path from smoking to mortality controlling for complication (SSI etc.), age, race/ethnicity, work RVU, surgeon specialty, ASA class, and year

<sup>a</sup> all coefficients were unstandardized and were rounded off to 2-digits after the decimal

<sup>b</sup> Variances used to compute standardized coefficients (22): var (Smoking) = 0.975, var (Mortality) = 0.036, var(predicted Mortality|Smoking [SSI]) = 3.44, var(predicted Mortality|Smoking [Cardiovascular, Pulmonary, and Composite]) = 3.43, var (SSI) = 0.028, var (predicted SSI|Smoking) = 3.32, var (predicted Mortality|Smoking & SSI) = 3.44, var (Cardiovascular) = 0.005, var (predicted Cardiovascular|Smoking) = 3.33, var (predicted Mortality|Smoking & Cardiovascular) = 3.45, var (Pulmonary) = 0.024, var (predicted Pulmonary|Smoking) = 3.52, var (predicted Mortality|Smoking & Pulmonary) = 3.49, var (Composite) = 0.051, var (predicted Composite|Smoking) = 3.37, var (predicted Mortality|Smoking & Composite) = 3.53

1  
2  
3 ° Variances used to compute standardized coefficients (22): var (Smoking) = 0.975, var (Mortality) = 0.054, var(predicted  
4 Mortality|Smoking [SSI]') = 3.49, var(predicted Mortality|Smoking [Cardiovascular, Pulmonary, and Composite]') = 3.48, var (SSI) =  
5 0.028, var (predicted SSI|Smoking') = 3.32, var (predicted Mortality|Smoking & SSI'') = 3.49, var (Cardiovascular) = 0.005, var  
6 (predicted Cardiovascular|Smoking') = 3.33, var (predicted Mortality|Smoking & Cardiovascular'') = 3.49, var (Pulmonary) = 0.024,  
7 var (predicted Pulmonary|Smoking') = 3.52, var (predicted Mortality|Smoking & Pulmonary'') = 3.52, var (Composite) = 0.051, var  
8 (predicted Composite|Smoking') = 3.37, var (predicted Mortality|Smoking & Composite'') = 3.54  
9  
10  
11  
12  
13  
14  
15  
16  
17  
18  
19  
20  
21  
22  
23  
24  
25  
26  
27  
28  
29  
30  
31  
32  
33  
34  
35  
36  
37  
38  
39  
40  
41  
42  
43  
44  
45  
46  
47  
48  
49

**Table 4.** Proportion of mediation of smoking to mortality association explained by each complication in unadjusted and adjusted

| Outcome           | Mediator                     | Proportion Mediation Unadjusted<br>for covariates | Proportion Mediation Adjusted for<br>covariates |
|-------------------|------------------------------|---------------------------------------------------|-------------------------------------------------|
| 6-month mortality | Surgical site infection      | 22.2%                                             | 2.0%                                            |
|                   | Cardiovascular complications | 12.2%                                             | 3.8%                                            |
|                   | Pulmonary complications      | 88.9%                                             | 21.6%                                           |
|                   | Composite outcome            | 86.4%                                             | 15.7%                                           |
| 1-year mortality  | Surgical site infection      | 12.6%                                             | 1.7%                                            |
|                   | Cardiovascular complications | 6.5%                                              | 3.0%                                            |
|                   | Pulmonary complications      | 42.7%                                             | 16.2%                                           |
|                   | Composite outcome            | 40.8%                                             | 11.3%                                           |

The proportion mediated has been shown to be unstable and should be interpreted with caution. Coefficient values (magnitude and significance) should be the main proponent in assessing mediation

**Figure 1.** Path diagram of the relations among the three standardized variables and standardized coefficients of paths

Figure legend:

a= regression coefficient for path from smoking to pulmonary complication

b= regression coefficient for path from pulmonary complication to 6-month mortality, controlling for smoking

c'= regression coefficient for path from smoking to 6-month mortality, controlling for pulmonary complication

c= regression coefficient for direct path from smoking to 6-month mortality

Smoking is the independent variable, pulmonary complication the mediator and 6-month mortality dependent variable. a, b, c and c' are coefficients from logistic regression analyses.

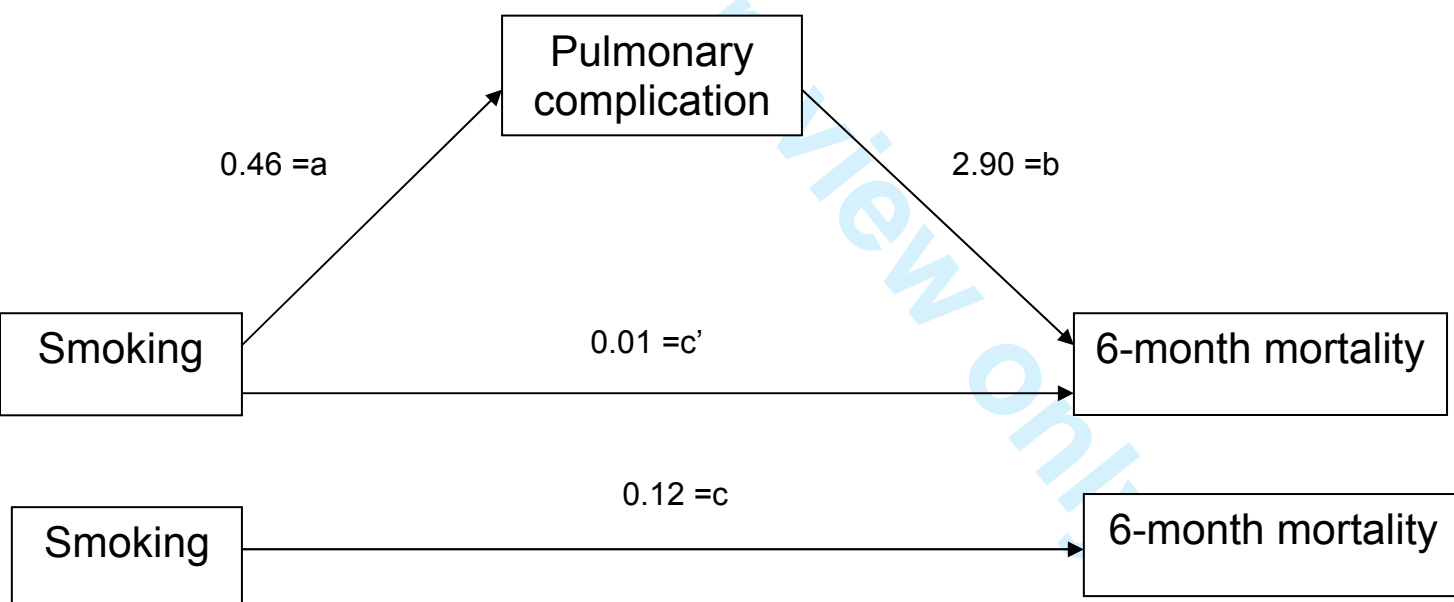

**References:**

1. Mokdad AH, Marks JS, Stroup DF, et al. Actual causes of death in the United States, 2000. *JAMA* 2004;291:1238-1245
2. Arozullah AM, Khuri SF, Henderson WG, et al. Development and validation of a multifactorial risk index for predicting postoperative pneumonia after major noncardiac surgery. *Ann Intern Med* 2001;135:847-857
3. Land T, Warner D, Paskowsky M, et al. Medicaid coverage for tobacco dependence treatments in Massachusetts and associated decreases in smoking prevalence. *PLoS One* 2010;5:e9770
4. CDC. State-Specific Prevalence of Cigarette Smoking and Smokeless Tobacco Use Among Adults --- United States, 2009. *MMWR Morb Mortal Wkly Rep* 2010;59:1400-1406
5. Office of Quality and Performance VHA. Health Behaviors Of Veterans In The VHA: Tobacco Use - 1999 Large Health Survey Of VHA Enrollees. Washington, DC: Veterans Health Administration; 2001
6. Mangram AJ, Horan TC, Pearson ML, et al. Guideline for prevention of surgical site infection, 1999. Hospital Infection Control Practices Advisory Committee. *Infect Control Hosp Epidemiol* 1999;20:250-278
7. Brooks-Brunn JA. Predictors of postoperative pulmonary complications following abdominal surgery. *Chest* 1997;111:564-571
8. Alberg AJ, Stashefsky Margalit R, Burke A, et al. The influence of offering free transdermal nicotine patches on quit rates in a local health department's smoking cessation program. *Addict Behav* 2004;29:1763-1778
9. Lenert L, Munoz RF, Perez JE, et al. Automated e-mail messaging as a tool for improving quit rates in an internet smoking cessation intervention. *J Am Med Inform Assoc* 2004;11:235-240

10. Koffman DM, Lee JW, Hopp JW, et al. The impact of including incentives and competition in a workplace smoking cessation program on quit rates. *Am J Health Promot* 1998;13:105-111
11. Mills E, Eyawo O, Lockhart I, et al. Smoking Cessation Reduces Postoperative Complications: A Systematic Review and Meta-analysis. *Am J Med* 2011;124:144-154 e148
12. Jones R, Nyawo B, Jamieson S, et al. Current smoking predicts increased operative mortality and morbidity after cardiac surgery in the elderly. *Interact Cardiovasc Thorac Surg* 2010
13. Sakuma LM, Machado FS, Martins Mde A. [Independent association of smoking with postoperative cardiac events and thirty-day mortality]. *Arq Bras Cardiol* 2010;94:625-632
14. Ashraf MN, Mortasawi A, Grayson AD, et al. Effect of smoking status on mortality and morbidity following coronary artery bypass surgery. *Thorac Cardiovasc Surg* 2004;52:268-273
15. Hawn MT, Houston T, Campagna E, et al. The Attributable Risk of Smoking on Surgical Complications. *Ann Surg* 2011 (in press)
16. Khuri SF, Daley J, Henderson W, et al. The National Veterans Administration Surgical Risk Study: risk adjustment for the comparative assessment of the quality of surgical care. *J Am Coll Surg* 1995;180:519-531
17. Davis CL, Pierce JR, Henderson W, et al. Assessment of the reliability of data collected for the Department of Veterans Affairs national surgical quality improvement program. *J Am Coll Surg* 2007;204:550-560
18. Baron RM, Kenny DA. The moderator-mediator variable distinction in social psychological research: conceptual, strategic, and statistical considerations. *J Pers Soc Psychol* 1986;51:1173-1182
19. Daley J, Khuri SF, Henderson W, et al. Risk adjustment of the postoperative morbidity rate for the comparative assessment of the quality of surgical care: results of the National Veterans Affairs Surgical Risk Study. *J Am Coll Surg* 1997;185:328-340



- 1  
2  
3 20. Dripps RD, Lamont A, Eckenhoff JE. The role of anesthesia in surgical mortality. JAMA  
4 1961;178:261-266  
5
- 6  
7 21. Weaver F, Hynes D, Hopkinson W, et al. Preoperative risks and outcomes of hip and  
8 knee arthroplasty in the Veterans Health Administration. J Arthroplasty 2003;18:693-708  
9
- 10 22. MacKinnon DP, Dwyer JH. Estimating mediated effects in prevention studies. Evaluation  
11 Review 1993;17:144-158  
12
- 13 23. Shrout PE, Bolger N. Mediation in experimental and nonexperimental studies: new  
14 procedures and recommendations. Psychol Methods 2002;7:422-445  
15
- 16 24. Karnath BM. Preoperative cardiac risk assessment. Am Fam Physician 2002;66:1889-  
17 1896  
18
- 19 25. Hoeks SE, Poldermans D. European Society of Cardiology 2009 guidelines for  
20 preoperative cardiac risk assessment and perioperative cardiac management in noncardiac  
21 surgery: key messages for clinical practice. Pol Arch Med Wewn 2010;120:294-299  
22
- 23 26. Almanaseer Y, Mukherjee D, Kline-Rogers EM, et al. Implementation of the ACC/AHA  
24 guidelines for preoperative cardiac risk assessment in a general medicine preoperative clinic:  
25 improving efficiency and preserving outcomes. Cardiology 2005;103:24-29  
26
- 27 27. Poldermans D, Bax JJ, Boersma E, et al. Guidelines for pre-operative cardiac risk  
28 assessment and perioperative cardiac management in non-cardiac surgery: the Task Force for  
29 Preoperative Cardiac Risk Assessment and Perioperative Cardiac Management in Non-cardiac  
30 Surgery of the European Society of Cardiology (ESC) and endorsed by the European Society of  
31 Anaesthesiology (ESA). Eur J Anaesthesiol 2010;27:92-137  
32
- 33 28. Sogame LC, Vidotto MC, Jardim JR, et al. Incidence and risk factors for postoperative  
34 pulmonary complications in elective intracranial surgery. J Neurosurg 2008;109:222-227  
35
- 36 29. Kanat F, Golcuk A, Teke T, et al. Risk factors for postoperative pulmonary complications  
37 in upper abdominal surgery. ANZ J Surg 2007;77:135-141  
38  
39  
40  
41  
42  
43  
44  
45  
46  
47  
48  
49  
50  
51  
52  
53  
54  
55  
56  
57  
58  
59  
60

- 1  
2  
3 30. Salahuddin N, Fatimi S, Huda S, et al. Predicting postoperative cardio-pulmonary  
4 complications by a test of stair climbing. J Coll Physicians Surg Pak 2005;15:761-764  
5  
6  
7 31. Hulzebos EH, Van Meeteren NL, De Bie RA, et al. Prediction of postoperative pulmonary  
8 complications on the basis of preoperative risk factors in patients who had undergone coronary  
9 artery bypass graft surgery. Phys Ther 2003;83:8-16  
10  
11  
12 32. Trayner E, Jr., Celli BR. Postoperative pulmonary complications. Med Clin North Am  
13 2001;85:1129-1139  
14  
15  
16 33. Mitchell CK, Smoger SH, Pfeifer MP, et al. Multivariate analysis of factors associated  
17 with postoperative pulmonary complications following general elective surgery. Arch Surg  
18 1998;133:194-198  
19  
20  
21 34. Dimick JB, Chen SL, Taheri PA, et al. Hospital costs associated with surgical  
22 complications: a report from the private-sector National Surgical Quality Improvement Program.  
23 J Am Coll Surg 2004;199:531-537  
24  
25  
26  
27  
28  
29  
30  
31  
32  
33  
34  
35  
36  
37  
38  
39  
40  
41  
42  
43  
44  
45  
46  
47  
48  
49  
50  
51  
52  
53  
54  
55  
56  
57  
58  
59  
60

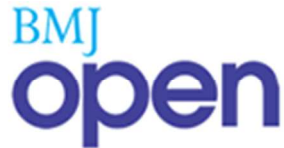

**Mediation of Smoking-Associated Postoperative Mortality by perioperative complications in Veterans undergoing Elective Surgery: Data from Veterans Affairs Surgical Quality Improvement Program (VASQIP)**

|                                 |                                                                                                                                                                                                                                                                                                                                                                                                                                                                                                                  |
|---------------------------------|------------------------------------------------------------------------------------------------------------------------------------------------------------------------------------------------------------------------------------------------------------------------------------------------------------------------------------------------------------------------------------------------------------------------------------------------------------------------------------------------------------------|
| Journal:                        | <i>BMJ Open</i>                                                                                                                                                                                                                                                                                                                                                                                                                                                                                                  |
| Manuscript ID:                  | bmjopen-2012-002157.R1                                                                                                                                                                                                                                                                                                                                                                                                                                                                                           |
| Article Type:                   | Research                                                                                                                                                                                                                                                                                                                                                                                                                                                                                                         |
| Date Submitted by the Author:   | 01-Feb-2013                                                                                                                                                                                                                                                                                                                                                                                                                                                                                                      |
| Complete List of Authors:       | Singh, Jasvinder; Birmingham VA Medical Center, Hawn, Mary; Birmingham VA Medical Center and University of Alabama at Birmingham, Campagna, Elizabeth; University of Colorado Denver, Colorado Health Outcomes Program<br>Henderson, William; University of Colorado Denver, Colorado Health Outcomes Program<br>Richman, Joshua; Birmingham VA Medical Center and University of Alabama at Birmingham,<br>Houston, Thomas; Center for Health Quality Outcomes and Economic Research, Bedford VA Medical Center, |
| <b>Primary Subject Heading</b>: | Health services research                                                                                                                                                                                                                                                                                                                                                                                                                                                                                         |
| Secondary Subject Heading:      | Rheumatology, Surgery, Smoking and tobacco                                                                                                                                                                                                                                                                                                                                                                                                                                                                       |
| Keywords:                       | EPIDEMIOLOGY, Rheumatology < INTERNAL MEDICINE, Hip < ORTHOPAEDIC & TRAUMA SURGERY, Knee < ORTHOPAEDIC & TRAUMA SURGERY, Adult orthopaedics < ORTHOPAEDIC & TRAUMA SURGERY, Orthopaedic & trauma surgery < SURGERY                                                                                                                                                                                                                                                                                               |
|                                 |                                                                                                                                                                                                                                                                                                                                                                                                                                                                                                                  |

SCHOLARONE™  
Manuscripts

1  
2  
3 **Mediation of Smoking-Associated Postoperative Mortality by perioperative complications**  
4 **in Veterans undergoing Elective Surgery: Data from Veterans Affairs Surgical Quality**  
5 **Improvement Program (VASQIP)**  
6  
7  
8

9 Jasvinder A. Singh<sup>1,4</sup>, Mary Hawn<sup>1,2</sup>, Elizabeth J. Campagna<sup>5,8</sup>, William G. Henderson<sup>5</sup>, Joshua  
10 Richman<sup>1</sup>, Thomas K. Houston<sup>6,7</sup>  
11

12 From the<sup>1</sup>Medicine Service, Birmingham VA Medical Center and Department of Medicine,  
13 University of Alabama at Birmingham, Birmingham, AL; <sup>2</sup>Center for Surgical Medical Acute Care  
14 Research and Transitions, Birmingham VA Medical Center, Birmingham, AL; <sup>3</sup>Division of  
15 Epidemiology, School of Public Health, University of Alabama at Birmingham, Birmingham, AL;  
16 <sup>4</sup>Department of Orthopedic Surgery, Mayo Clinic College of Medicine, Rochester, MN;  
17 <sup>5</sup>Colorado Health Outcomes Program, University of Colorado Denver, Aurora, CO; <sup>6</sup>Center for  
18 Health Quality Outcomes and Economic Research, Bedford VA Medical Center, Bedford, MA;  
19 <sup>7</sup>Department of Quantitative Health Sciences, University of Massachusetts Medical School,  
20 Worcester, MA; <sup>8</sup>VA Medical Center, Denver, CO  
21  
22  
23  
24  
25  
26  
27  
28  
29  
30  
31  
32

33 **Grant support:** This material is the result of work supported with VA IIR IAB 06-038-2 and the  
34 use and resources of facilities at the Department of Veterans Affairs Medical Centers at  
35 Bedford, Massachusetts; Birmingham, Alabama; and Denver, Colorado. Dr. Singh is supported  
36 by research grants from the National Institute of Aging, National Cancer Institute and Agency for  
37 Health Quality and Research Center for Education and Research on Therapeutics (CERTs).  
38  
39  
40  
41  
42  
43

44 **Financial Conflict:** There are no financial conflicts related to this work. Dr. Singh has received  
45 investigator-initiated research grants from Allergan, Takeda and Savient; consultant fees from  
46 URL pharmaceuticals, Takeda, Savient, Ardea, Allergan and Novartis; and is a member of the  
47 executive of OMERACT, an organization that develops outcome measures in rheumatology and  
48 receives arms-length funding from 36 companies. Dr. Singh is also a member of the American  
49 College of Rheumatology's Guidelines Subcommittee of the Quality of Care Committee and  
50  
51  
52  
53  
54  
55  
56  
57  
58  
59  
60

1  
2  
3 Veterans Affairs Rheumatology Field Advisory Committee. Other authors declare no conflict of  
4  
5 interest.  
6

7  
8 Each author certifies that his or her institution has approved the human protocol for this  
9  
10 investigation and that all investigations were conducted in conformity with ethical principles of  
11  
12 research.  
13

14 **Correspondence:** Jasvinder A. Singh, MBBS, MPH, University of Alabama at Birmingham,  
15  
16 Faculty Office Tower 805B, 510 20<sup>th</sup> Street S, Birmingham, AL 35294.

17  
18 Phone: 205-996-5885 Fax : 205-996-9685 E-mail: [Jasvinder.md@gmail.com](mailto:Jasvinder.md@gmail.com)  
19

20  
21 "The views expressed in this article are those of the authors and do not necessarily reflect the  
22  
23 position or policy of the Department of Veterans Affairs or the United States government."  
24

25 Word Count: 3,024

26 Abstract: 246

27 **Keywords:** Smoking, elective surgery, mortality, mediator, Veterans  
28

29 **Running Title:** Mediators of Mortality in Smokers Undergoing Arthroplasty  
30  
31  
32  
33  
34  
35  
36  
37  
38  
39  
40  
41  
42  
43  
44  
45  
46  
47  
48  
49  
50  
51  
52  
53  
54  
55  
56  
57  
58  
59  
60

## Article Summary

### 1) Article Focus -

- We aimed to examine whether smoking-associated post-operative mortality is mediated through smoking-associated postoperative complications in patients who are current smokers at the time of their surgery.
- We hypothesized that specific smoking-associated complications (SSI, pulmonary, cardiovascular) in the post-operative period in current smokers, mediate smoking-related 6-month and 1-year mortality.

### 2) Key Messages -

- Pulmonary complications, followed by cardiovascular and surgical site infection complications were mediators of smoking-associated 6-month and 1-year mortality after elective knee or hip replacement surgery.
- Preoperative smoking counseling and implementation of smoking cessation programs should be done prior to an elective surgery such as knee/hip replacement.
- Early treatment of complications that mediate postoperative 1-year mortality may help to reduce risk of dying after an elective surgery.

### 3) Strengths and Limitations -

#### Strengths:

- Use of prospectively, collected national data in the largest integrated health care system in the U.S.

- Outcomes and complications had been defined using standardized definitions and validated by nurse abstractors

Limitations:

- Findings may not be generalizable to women and non-veteran U.S. population, since our sample included primarily men, representative of U.S. veterans.
- The current smoker variable is collected retrospectively from medical records, which could lead to misclassification bias and underestimation of the association.
- Smoking status may change over time and the current study could not take that into account, since ongoing smoking status data are not available.
- Mediation assumes no unmeasured variables and despite accounting for all the important variables to the best of our capability with the given data, residual confounding is possible.

□

**ABSTRACT**

**Objective:** To assess the mediation of smoking-associated post-operative mortality by post-operative complications.

**Design:** Observational Cohort Study

**Setting:** Using data from the Veterans Affairs Surgical Quality Improvement Program, a quality assurance program for major surgical procedures in the VA healthcare system, we assessed the association of current smoking at the time of the surgery with 6-month and 1-year mortality.

**Primary and Secondary Outcome Measures:** Using mediation analyses, we calculated the relative contribution of each smoking-associated complication to smoking-associated postoperative mortality, both unadjusted and adjusted for age, race/ethnicity, work relative value unit of the operation, surgeon specialty, American Society of Anesthesiologists class, and year of surgery. Smoking-associated complications included surgical site infection, cardiovascular complications (myocardial infarction, cardiac arrest, and/or stroke), and pulmonary complications (pneumonia, failure to wean, and/or re-intubation).

**Results:** There were 186,632 never-smokers and 135,741 current smokers. The association of smoking and mortality was mediated by smoking-related complications with varying effects. In unadjusted analyses, the proportions of mediation of smoking to 6-month mortality explained by the complications were as follows: SSI, 22%; cardiovascular complications, 12%; and pulmonary complications, 89%. In adjusted analyses, the percents mediated by each complication were as follows: SSI, 2%; cardiovascular complications, 4%; and pulmonary complications, 22%. In adjusted analyses for 1-year mortality, respective percents mediated were 2%, 3% and 16%.

**Conclusions:** Pulmonary complications, followed by cardiovascular and SSI complications were mediators of smoking-associated 6-month and 1-year mortality. Interventions targeting smoking cessation and prevention and early treatment of pulmonary complications has the likelihood of reducing post-operative mortality after elective surgery.



## INTRODUCTION

Smoking is the leading cause of preventable death in the U.S. (1, 2). While the prevalence of smoking in the U.S. has decreased (3), smoking is still highly prevalent with a recent national survey showing between 10-26% prevalence in most U.S. states (4). The prevalence of smoking in veterans using Veterans Affairs (VA) health care is even higher, at 30% (5). Smoking has detrimental effects on cardiovascular and lung health, and is linked to increased risk of surgical complications. Specifically, smokers undergoing surgery have a higher risk of several postoperative complications including wound infections, pneumonia, and mortality (6, 7). Smoking is a modifiable risk factor (8-10). Preoperative smoking cessation is associated with decreased postoperative wound complications and total complications (11).

While smoking-related postoperative morbidity is important, smoking is also associated with increased post-operative mortality (12-14). There are several proposed mechanisms of increased mortality in the perioperative period for smokers, including higher risk of cardiac (12, 13) and pulmonary complications (14). To our knowledge, no previous studies have assessed to what degree the increased smoking-associated postoperative mortality is mediated by specific complications associated with smoking. This has important consequences for designing interventions to improve outcomes. If the effect of smoking on mortality were direct (direct toxic effects on health; low likelihood), then the only effective method to improve smoking-related outcomes would be smoking cessation. Alternatively, to the extent that smoking is related to mortality through an increase in pulmonary complications among smokers, then the effect of smoking is said to act through the mediating factor of pulmonary complications. Such a result would suggest that interventions to reduce pulmonary complications among smokers may be an additional strategy for improving the mortality outcome.

We have recently demonstrated that smoking was associated with both postoperative surgical site infections (SSI) and pulmonary complications in a large cohort of veterans who underwent surgery in VA medical facilities and that mortality was also increased in this cohort

1  
2  
3 (15). These data are collected prospectively and systematically as part of the National VA  
4  
5 Surgical Quality Improvement Program (VASQIP) (16) (17).  
6

7  
8 In this study we aimed to examine whether smoking-associated post-operative mortality  
9  
10 is mediated through smoking-associated postoperative complications in patients who are  
11  
12 current smokers at the time of their surgery. Conceptually, “mediation” occurs when a cause  
13  
14 and its effect are linked through an intervening factor that is part of the causal chain of events  
15  
16 (18). As an example, this study explored the link between smoking and postoperative morbidity  
17  
18 and mortality. We hypothesized that specific smoking-associated complications (SSI,  
19  
20 pulmonary, cardiovascular) in the post-operative period in current smokers, mediate smoking-  
21  
22 related 6-month and 1-year mortality. This was done in two steps: we first established a link  
23  
24 between smoking and adverse outcomes, and we then investigated and quantified the  
25  
26 proportion of the observed association appearing to act through a particular and plausible  
27  
28 mediator, in this case, smoking-associated complication.  
29  
30  
31  
32  
33  
34  
35  
36  
37  
38  
39  
40  
41  
42  
43  
44  
45  
46  
47  
48  
49  
50  
51  
52  
53  
54  
55  
56  
57  
58  
59  
60

## METHODS

### Ethical Approval, Study Funding and Data sharing

The study was approved by the Institutional Review Boards at the VA Medical Centers (Birmingham, AL, Bedford, MA, Boston, MA and Seattle, WA), the University of Colorado, and by the Surgical Quality Data Use Group of VA Patient Care Services in VA Central Office, Washington, DC (as needed for studies using data from this dataset). All analyses used SAS version 9.2 (SAS Institute Inc., Cary, North Carolina). This material is the result of work supported with VA Investigator-Initiated Research (IIR) IAB 06-038-2. Additionally, Dr. Singh's time was protected by research grants from the National Institute of Aging, National Cancer Institute and Agency for Health Quality and Research Center for Education and Research on Therapeutics (CERTs). We are committed to sharing the data with colleagues after an ethics committee approval and in accordance with VA data privacy and data security rules.

### Study Sample

We used data from the VASQIP, a system-wide initiative instituted in 1994 to improve the quality of surgical care through prospective collection and reporting of comparative risk-adjusted post-operative outcomes of major surgeries requiring general, spinal, or epidural anesthesia(19). The abstracted data are >99% complete with >96% inter-observer agreement(17). We requested all cases in major procedure groups defined by CPT codes within each of the 8 surgical subspecialties (general, vascular, orthopedic, thoracic, otolaryngology, urology, neurosurgery, and plastic surgery) for the years 2002-2008. This produced a sample of roughly 60-70% of all non-cardiac operations in the VASQIP database for those years (n=507,545). We selected the first operation for each patient greater than or equal to 19 years of age, resulting in 412,511 unique patients. We excluded 17,202 patients coded as having emergency operations, since we wanted to focus on elective surgeries. We also excluded 1,515 patients who were coded as a current smoker but who had 0 pack-years (an

1  
2  
3 inconsistency) or were missing the current smoker variable. Since our focus was current  
4 smoking, we excluded 71,421 prior smokers leaving a total of 322,373 patients for analysis.  
5  
6  
7  
8

#### 9 10 Independent Measure: Current Smoking

11 Smoking status was assessed using two variables. Patients are queried at the time of  
12 elective surgery if they have smoked cigarettes in the year prior to admission (yes/no) and  
13 regarding amount of smoking (pack years = the number of packs smoked per day multiplied by  
14 the number of years the patient smoked), documented in patients' medical records. Never-  
15 smokers were patients who had no smoking in the prior year and zero (or missing) pack years.  
16 Current smokers were those who responded "yes" to smoking in the year prior to admission and  
17 had pack years not equal to zero.  
18  
19  
20  
21  
22  
23  
24  
25  
26  
27  
28

#### 29 Dependent Measure: Mortality

30 Mortality was assessed at 6-months and at 1-year. The VASQIP nurses collect 30-day  
31 postoperative vital status for all patients assessed in the VASQIP program. Once every 6  
32 months, the VASQIP database is passed through the VA administrative vitals file to obtain data  
33 on long-term postoperative mortality beyond 30 days after surgery.  
34  
35  
36  
37  
38  
39  
40  
41

#### 42 Mediation Variables: 30-day Outcomes for Complications

43 All complications of interest were assessed 30-days after elective surgery. Specifically,  
44 the outcomes included: (1) SSI; (2) Cardiovascular complication, defined as occurrence of  
45 myocardial infarction (MI), cardiac arrest, and/or stroke; (3) Pulmonary complication, defined as  
46 occurrence of pneumonia, failure to wean, and/or re-intubation; and (4) Overall composite  
47 outcome, defined as the occurrence of SSI, cardiovascular and/or pulmonary complication. All  
48 outcomes have standard definitions in VASQIP and are extracted and validated for each patient  
49  
50  
51  
52  
53  
54  
55  
56  
57  
58  
59  
60

1  
2  
3 by an independent nurse abstractor at each VA site for the 30-day period after the surgery (16,  
4  
5 17).

### 6 7 8 9 10 Covariates: Patient, Surgeon, and Procedural Characteristics

11  
12 Patient characteristics including age, race/ethnicity, American Society of  
13  
14 Anesthesiologists (ASA) class, year of surgery, work relative value unit (RVU) for the operation,  
15  
16 and wound classification were extracted. ASA class is a validated measure of peri-operative  
17  
18 mortality and immediate post-operative morbidity, categorized into five classifications (20, 21)  
19  
20 (class I, normal healthy patient; class II, patient with mild systemic disease (with no functional  
21  
22 limitation); class III, patient with severe systemic disease (with some functional limitation); class  
23  
24 IV, patient with severe systemic disease that is a constant threat to life; class V, moribund  
25  
26 patient). Work RVU (a measure of procedure duration and complexity) and surgeon  
27  
28 subspecialty were collected by chart review. These variables were chosen based on previous  
29  
30 literature of association of these factors with mortality or because they represented the  
31  
32 complexity of the surgery.  
33  
34  
35  
36  
37

### 38 Statistical Analyses

39  
40 Summary statistics were calculated for clinical and demographic characteristics.  
41  
42 Mediation analysis was done without and with controlling for covariates that could potentially  
43  
44 confound the relationship. Univariable and multivariable-adjusted logistic regression analyses  
45  
46 were used to compute coefficients for association of smoking and mortality, smoking and major  
47  
48 complications (SSI, pulmonary, cardiovascular or composite) and major complications and  
49  
50 mortality, to assess mediation effect of complications on the relationship between smoking and  
51  
52 mortality. In multivariable analyses, we adjusted for age, race/ethnicity, work RVU, surgeon  
53  
54 specialty, ASA class, and year at each step of the mediation analysis. Wound classification was  
55  
56 additionally adjusted for in the model when assessing the mediation effect of SSI.  
57  
58  
59  
60

1  
2  
3 The conceptual framework of “mediation” indicates that mediation occurs when a cause  
4 and its effect are linked through an intervening factor that is part of the causal chain of events  
5 (18). The classic exposition of statistical mediation analysis was given by Baron and Kenny in  
6 1986 (18). The mediating relationship was conceived in causal terms, so while it was  
7 recognized that the statistical models cannot establish causality, the causal interpretation of the  
8 posited relationships must be plausible. The precondition was that the independent variable  
9 (smoking) is statistically significantly associated with the dependent variable (e.g. 6-month  
10 mortality). The total effect of smoking on mortality was denoted by the path “c” in figure 1  
11 representing the association of smoking on mortality without adjustment for the potential  
12 mediator. Baron and Kenny outlined three steps for a formal mediation analysis using  
13 regression, which can be explained with reference to figure 1 in the context of the relationship  
14 between smoking and 6-month mortality with the putative mediating effect of pulmonary  
15 complications. The first step was to establish that there is a significant association between the  
16 independent variable (smoking) and the potential mediator (pulmonary complications)  
17 corresponding to the path coefficient “a” in figure 1. The second step was to establish that the  
18 potential mediator (pulmonary complications) is associated with the dependent variable (6-  
19 month mortality), while controlling for the independent variable (smoking), corresponding to the  
20 path coefficient “b”. Last, when controlling for the mediator (pulmonary complications) the “direct  
21 effect” of the independent variable (smoking) on the dependent variable (6-month mortality)  
22 corresponds to the coefficient “c”. We interpret the ‘direct effect’ to be the ‘lifetime exposure’  
23 of smoking. Less technically, if 1) smoking was related to both pulmonary complications and  
24 mortality, 2) pulmonary complications were related to mortality, and 3) the magnitude of the  
25 relationship between smoking and mortality decreased by a statistically significant amount when  
26 controlling for pulmonary complications, then there was a significant amount of mediation by  
27 pulmonary complications.  
28  
29  
30  
31  
32  
33  
34  
35  
36  
37  
38  
39  
40  
41  
42  
43  
44  
45  
46  
47  
48  
49  
50  
51  
52  
53  
54  
55  
56  
57  
58  
59  
60

1  
2  
3           Arithmetically, the indirect effect is equal to the product of coefficients  $a*b$  and the total  
4 effect ( $c$ ), is equal to the indirect effect ( $a*b$ ) plus the remaining direct effect ( $c'$ ), thus:  $c=a*b +c'$ ,  
5 so  $c'=c-a*b$ . Clearly, as the indirect effect through the mediator gets larger, the residual direct  
6 effect must decrease, implying that a larger part of the effect is via the mediator. The more the  
7 direct effect is diminished, the greater part of the effect is mediated.  
8  
9

10           The statistical significance of the mediated, or indirect, effect was determined by testing  
11 whether the product  $a*b$  is statistically different from zero. The standard approximate test was  
12 due to the work of Sobel, and presented by Baron and Kenny (18). Subsequent work, notably  
13 by Shrout and Bolger (23) note that the Sobel test can be overly conservative for small samples  
14 but also that this ceases to be a concern when the sample size is greater than 1,000. The much  
15 larger sample size of this study suggested that the Sobel test was adequate in this context.  
16  
17

18           To evaluate the importance of the mediation it can be informative to calculate the  
19 proportion of the effect due to mediation as the indirect effect divided by the total effect as  $a*b/c$ .  
20 In our work, the independent, dependent, and mediator variable were all dichotomous. In this  
21 context where logistic regression is used  $a*b+c'$  may only approximate  $c$ , so we followed the  
22 methods of MacKinnon and Dwyer (22) and calculated the proportion of the effect due to  
23 mediation using coefficients standardized to the same scale. We present only the  
24 unstandardized coefficients because they are more interpretable within the context of the  
25 individual regression models.  
26  
27  
28  
29  
30  
31  
32  
33  
34  
35  
36  
37  
38  
39  
40  
41  
42  
43  
44  
45  
46  
47  
48  
49  
50  
51  
52  
53  
54  
55  
56  
57  
58  
59  
60

## RESULTS

There were 186,632 never-smokers and 135,741 current smokers. The mean age was 63 years for never smokers and 58 years for current smokers. 95% were men and 63% were White (race/ethnicity missing in 19%) (**Table 1**). Diabetes was less common among current smokers compared to never smokers, but COPD, dyspnea, and alcohol consumption were more common. Other characteristics were similar between the two groups (**Table 1**). Crude estimates of outcomes by smoking status us shown in **Table 2**.

### Mediation Analyses for 6-month and 1-year mortality

Unstandardized coefficients were calculated without (unadjusted; **Table 3**) and with (adjusted; **Table 4**) potential confounders using regression analyses. Variances for computing standardized coefficients are footnoted. The unadjusted coefficients were highest between smoking and pulmonary complications (coefficient a =0.46), and between pulmonary complication and 6-month mortality, controlling for smoking was (coefficient b =2.90) among all complications (**Table 3**); similar observations were made for pulmonary complications and 1-year mortality. In general unadjusted coefficients were higher than adjusted coefficients.

**Table 4** provides coefficients for the mediation analyses controlling for confounding from age, race/ethnicity, work RVU, surgeon specialty, ASA class, and year for 6-month and 1-year mortality. Mediation analysis for SSI additionally controlled for wound classification. The coefficients for the path from smoking to 6- and 12-month mortality when considering the mediation factor of SSI were 0.39 and 0.45 (coefficient c). Again as an example, the coefficient between smoking and pulmonary complications was 0.48 (coefficient a), between pulmonary complication and 6-month mortality controlling for smoking was 2.17 (coefficient b), and that between smoking and 6-month mortality controlling for pulmonary complication was 0.32 (coefficient c'). The association between smoking and 6-month mortality was significantly mediated by pulmonary complication (22%) (**Table 5**). For 6-month mortality, adjusted



1  
2  
3 coefficients between smoking and complications were highest for pulmonary complications  
4 (0.48), followed by composite outcome (0.29), SSI (0.19) and cardiovascular complications  
5 (0.19) (coefficient a). Adjusted coefficients were highest for pulmonary followed by  
6 cardiovascular, composite and SSI complications for association with 6-month mortality,  
7 controlling for smoking (coefficient b). The proportion of mediation of smoking to 6-month  
8 mortality explained by the complications in adjusted analyses was 16% for the composite  
9 outcome, while the proportions were lower for SSI (2%) and cardiovascular complications (4%)  
10  
11  
12  
13  
14  
15  
16  
17  
18  
19 **(Table 5).**

20  
21 Similar patterns were noted for mediation of smoking and 1-year mortality for adjusted  
22 coefficients **(Table 4)**. In the adjusted models, the proportion of mediation of smoking to 1-year  
23 mortality explained by the complications in adjusted analyses was 16% for pulmonary  
24 complications, 11% for composite complications, 3% for cardiovascular complications and 2%  
25 for SSI **(Table 5)**.  
26  
27  
28  
29  
30  
31  
32  
33  
34  
35  
36  
37  
38  
39  
40  
41  
42  
43  
44  
45  
46  
47  
48  
49  
50  
51  
52  
53  
54  
55  
56  
57  
58  
59  
60

## DISCUSSION

1  
2  
3  
4  
5  
6  
7  
8  
9  
10  
11  
12  
13  
14  
15  
16  
17  
18  
19  
20  
21  
22  
23  
24  
In this analysis of prospectively collected data in a national sample of non-cardiac elective surgeries at VA facilities, we found that increased 6-month and 1-year smoking-associated mortality was mediated by pulmonary complications and to a lesser extent cardiovascular complications and surgical site infections. Not unexpectedly, estimates of the proportion of smoking-related mortality mediated by each peri-operative complication were all numerically larger for 6-month mortality compared to that for 1-year mortality, although this was not tested statistically. The proportion mediated by complications also attenuated significantly between adjusted and unadjusted analyses, as expected. These observations are novel and have important implications for targeting interventions for patients undergoing elective surgery.

25  
26  
27  
28  
29  
30  
31  
32  
33  
34  
35  
36  
37  
38  
39  
40  
41  
42  
43  
44  
45  
46  
47  
48  
49  
50  
51  
52  
53  
54  
55  
56  
57  
58  
59  
60  
That smoking is associated with increased mortality after elective surgical procedures is well known (24, 25). Preoperative period has been proposed a “window of opportunity” and a “teachable moment” to help patients quit smoking (26, 27). This study examined a critical question, i.e., is this increased mortality mediated by the postoperative complications seen more commonly in smokers than in non-smokers? The evidence presented here confirmed that these postoperative complications mediated significant proportion of increased mortality risk, and that this varied by the type of complication. Pulmonary complications explained the most variation in this increased risk, as compared to cardiovascular complications or surgical site infections. Our findings suggest pulmonary complications are far more important contributors to the smoking-mortality association than the cardiovascular complications. There has been significant emphasis placed on pre-operative cardiac risk assessment for non-cardiac surgery (28). Consensus statements on cardiac risk stratification including who should undergo screening and revascularization and management of patients with implanted cardiac stents have been developed and widely disseminated (29-31). Perhaps this focus and attention on identifying and intervening on cardiac risk has mitigated the associations of smoking related cardiovascular events with mortality, in both smokers and never smokers. Similar attention has not been given

1  
2  
3 to pre-operative risk stratification for post-operative pulmonary events. These events occur more  
4 frequently than cardiovascular events and lead to substantial post-operative mortality (32-37).  
5

6  
7 Perioperative complications associated with smoking mediated a high proportion of the  
8 association of smoking and mortality before adjustment. But the proportion mediation was  
9 greatly attenuated after adjustment. This suggests that a major part of the mediation effect was  
10 contained in variables we adjusted for, including ASA class. In addition, some of the  
11 association of smoking and subsequent mortality is related to lifetime exposure to smoking  
12 (direct effect), and not the association of smoking on perioperative complications (indirect effect  
13 through pulmonary complications). This may be related to occurrence of major lifetime  
14 complications from smoking, for example, COPD, coronary artery disease, various cancers and  
15 stroke, which can all contribute to postoperative mortality.  
16  
17

18  
19 We did find that even after adjustment, smoking-related pulmonary complications  
20 mediated over 15% of the association of smoking and postoperative mortality. Thus, part of the  
21 association of smoking on mortality is due to a lifetime exposure, as shown previously (38, 39),  
22 and part due to immediate complications, such as pulmonary complications. The first goal  
23 should always be to get smokers to quit prior to surgery. But acknowledging that not all  
24 smokers will quit prior to their surgery, the surgical staff should be especially vigilant of  
25 pulmonary complications, as our data clearly demonstrates them to mediate mortality. Careful  
26 monitoring of adherence to pneumonia prevention guidelines in postoperative period as well as  
27 early diagnosis and management may lead to reduction in mortality. Far more importantly,  
28 preventive pre-operative evaluation and optimization of pulmonary health in addition to  
29 implementation of preoperative smoking cessation programs in patients undergoing elective  
30 surgery have the likelihood of reducing the increased mortality risk. Consensus statements on  
31 pulmonary risk assessment and patients who should be referred for intervention are strongly  
32 needed.  
33  
34  
35  
36  
37  
38  
39  
40  
41  
42  
43  
44  
45  
46  
47  
48  
49  
50  
51  
52  
53  
54  
55  
56  
57  
58  
59  
60

1  
2  
3 We found that the attributable risk of SSI to smoking-related mortality was lower than  
4 that for pulmonary and cardiovascular complications. SSIs constitute the most common  
5 infection, accounting for 38% of all infections (6). In addition, SSIs are associated with  
6 significant increases in hospital stay,(6) making them one of the most costly post-operative  
7 complications.(6, 40). SSIs are the third most common nosocomial infection overall,  
8 representing 14% of all hospital acquired infections. Thus even though their contribution to  
9 mortality is lower, their common prevalence and the ability to institute measures to prevent them  
10 make them suitable targets for interventions.  
11  
12  
13  
14  
15  
16  
17  
18  
19

20 The proportion mediated by each of three complications was attenuated by adjustment  
21 for age, race/ethnicity, work RVU, surgeon specialty and ASA class, indicating that these factors  
22 may have contributed to mortality outcome. In addition, other factors that we did not measure in  
23 this study such as other smoking-related diseases such as cancer, COPD etc. may have  
24 contributed. Additionally, as is common in observational studies such as ours, smoking status  
25 may be a marker for unmeasured variables that may be causal. Thus, smoking status should  
26 alert clinicians to other factors, which may need to be addressed preoperatively.  
27  
28  
29  
30  
31  
32  
33  
34  
35

36 Our study has several limitations. It is possible that findings may not be generalizable to  
37 women, since our sample included primarily men, representative of U.S. veterans. These  
38 findings may not be generalizable to non-veterans; however, it is unlikely that the pathway of  
39 smoking-associated mortality risk differs by veteran status. The current smoker variable in  
40 VASQIP is collected retrospectively from medical records, which could lead to misclassification  
41 bias and underestimation of the association. Thus, these results are conservative estimates of  
42 these associations. Another limitation is that smoking status may change over time and current  
43 study design and analyses did not take that into account. Mediation assumes no unmeasured  
44 variables; this is of course not true as we can never account for all omitted factors. We  
45 accounted for all the important variables to the best of our capability with the given data.  
46  
47  
48  
49  
50  
51  
52  
53  
54  
55  
56  
57  
58 Another limitation of the mediation analysis is that the proportion mediated is influenced by  
59  
60

1  
2  
3 sample size, coefficient estimates, and distribution of the outcomes/predictors and since our  
4 variables were dichotomous and we have small standardized coefficient estimates.<sup>1</sup> Cause of  
5 death was not available to us, so these details could not be provided for smokers and never  
6 smokers.  
7  
8  
9  
10

11  
12 In conclusion, this study found that a high proportion of association between smoking  
13 and post-operative 6-month and 1-year mortality is mediated by postoperative complications,  
14 especially pulmonary complications. Future efforts at reducing post-operative mortality should  
15 be aimed at pre-operative risk identification and intervention. Efforts directed at pulmonary risk  
16 stratification, surveillance and prevention for pulmonary and other complications in smokers  
17 undergoing elective surgery may likely impact mortality in current smokers undergoing elective  
18 surgical procedures.  
19  
20  
21  
22  
23  
24  
25  
26  
27  
28  
29  
30  
31  
32  
33  
34  
35  
36  
37  
38  
39  
40  
41  
42  
43  
44  
45  
46  
47  
48  
49  
50  
51  
52  
53  
54  
55  
56  
57  
58  
59  
60

1  
2  
3  
4  
5  
6  
7  
8  
9  
10  
11  
12  
13  
14  
15  
16  
17  
18  
19  
20  
21  
22  
23  
24  
25  
26  
27  
28  
29  
30  
31  
32  
33  
34  
35  
36  
37  
38  
39  
40  
41  
42  
43  
44  
45  
46  
47  
48  
49  
50  
51  
52  
53  
54  
55  
56  
57  
58  
59  
60

**ACKNOWLEDGMENT**

The authors would like to acknowledge The VA Surgical Quality Data Use Group (SQDUG) for its role as scientific advisors and for the critical review of data use and analysis presented in this manuscript.

For peer review only

## TABLES AND FIGURES

**Table 1.** Patient characteristics by smoking status\* (Column percents unless noted otherwise)

| Characteristic                | Never<br>Smoked<br>(n=186,632) | Current<br>Smoker<br>(n=135,741) |
|-------------------------------|--------------------------------|----------------------------------|
| Smoking Pack Years, mean (SD) | N/A                            | 48.8 (32.6)                      |
| Demographics                  |                                |                                  |
| Age, mean (SD)                | 63.1 (13.7)                    | 57.6 (11.0)                      |
| Sex                           | Female                         | 5.1%                             |
|                               | Male                           | 94.9%                            |
| Race/Ethnicity                | White                          | 62.3%                            |
|                               | Black                          | 12.3%                            |
|                               | Hispanic                       | 5.3%                             |
|                               | Other/Unknown                  | 20.2%                            |
| Comorbidities                 |                                |                                  |
| Diabetes                      | 20.2%                          | 14.6%                            |
| Congestive heart failure      | 1.2%                           | 1.0%                             |
| History of severe COPD        | 7.0%                           | 18.4%                            |
| Dyspnea                       | 8.4%                           | 15.4%                            |
| Chronic Corticosteroid use    | 1.7%                           | 1.7%                             |
| Renal failure/Dialysis        | 0.7%                           | 0.5%                             |
| CVA/Stroke                    | 5.9%                           | 6.6%                             |
| Transient ischemic attacks    | 2.9%                           | 3.6%                             |

1  
2  
3  
4  
5  
6  
7  
8  
9  
10  
11  
12  
13  
14  
15  
16  
17  
18  
19  
20  
21  
22  
23  
24  
25  
26  
27  
28  
29  
30  
31  
32  
33  
34  
35  
36  
37  
38  
39  
40  
41  
42  
43  
44  
45  
46  
47  
48  
49  
50  
51  
52  
53  
54  
55  
56  
57  
58  
59  
60

|                                        |                     |       |       |
|----------------------------------------|---------------------|-------|-------|
| Functional health status               | Independent         | 93.5% | 94.8% |
|                                        | Partially dependent | 5.2%  | 4.6%  |
|                                        | Totally dependent   | 1.3%  | 0.6%  |
| >10% loss body weight in past 6 months |                     | 1.8%  | 3.4%  |
| Disseminated cancer                    |                     | 1.0%  | 1.3%  |
| Open wound/wound infection             |                     | 3.2%  | 4.3%  |
| DNR status                             |                     | 0.9%  | 0.6%  |
| Alcohol > 2 drinks/day                 |                     | 4.3%  | 14.6% |
| Operative Characteristics              |                     |       |       |
| Anesthesia technique                   | General             | 79.4% | 84.8% |
|                                        | Epidural/Spinal     | 15.6% | 10.9% |
|                                        | Local/Monitored     | 5.1%  | 4.2%  |
| ASA classification                     | 1                   | 4.4%  | 1.6%  |
|                                        | 2                   | 35.8% | 33.4% |
|                                        | 3                   | 53.8% | 58.2% |
|                                        | 4/5                 | 6.1%  | 6.8%  |
|                                        |                     |       |       |
| Admission status                       | Outpatient          | 51.0% | 47.1% |
|                                        | Inpatient           | 49.0% | 52.9% |
| Specialty of Surgeon                   | General Surgery     | 39.3% | 35.3% |
|                                        | Neurosurgery        | 5.4%  | 7.9%  |
|                                        | Orthopedic Surgery  | 29.6% | 21.9% |
|                                        | Otolaryngology      | 1.1%  | 1.3%  |
|                                        | Plastic Surgery     | 0.6%  | 0.6%  |
|                                        | Thoracic Surgery    | 1.7%  | 5.6%  |
|                                        | Urology             | 15.6% | 13.1% |



|                                  |                    |            |            |
|----------------------------------|--------------------|------------|------------|
|                                  | Cardiovascular     | 6.3%       | 13.8%      |
|                                  | Surgery            |            |            |
|                                  | Other              | 0.4%       | 0.4%       |
| Wound Classification             | Clean              | 70.0%      | 70.8%      |
|                                  | Clean/contaminated | 27.3%      | 26.2%      |
|                                  | Contaminated       | 1.6%       | 1.6%       |
|                                  | Infected           | 1.2%       | 1.4%       |
| Work RVU (mean, SD)              |                    | 14.1 (7.1) | 14.8 (7.8) |
| Operation time, hours (mean, SD) |                    | 1.9 (1.4)  | 2.1 (1.6)  |

**\*All p-value are < 0.001 with the exception of steroid use, for which was 0.581**

N/A, not applicable; SD, standard deviation; RUV, relative value units; ASA, American Society of Anesthesiologists; DNR, Do not resuscitate; COPD, chronic obstructive pulmonary disease; CVA, cerebrovascular accident

Table 2. Frequency of Outcomes by Smoking status

| Postoperative Outcome                           | Never Smoked<br>(n=186,632) | Current Smoker<br>(n=135,741) |
|-------------------------------------------------|-----------------------------|-------------------------------|
| <b>Surgical site infection</b>                  | 2.4                         | 3.4                           |
| <b>Vascular complications</b>                   | 0.5                         | 0.5                           |
| Cerebral vascular accident/Stroke               | 0.2                         | 0.3                           |
| Myocardial infarction                           | 0.3                         | 0.3                           |
| <b>Pulmonary complications</b>                  | 2.0                         | 3.1                           |
| Reintubation for respiratory or cardiac failure | 0.9                         | 1.6                           |
| Pneumonia                                       | 1.2                         | 1.9                           |
| Failure to wean > 48 hours                      | 0.8                         | 1.4                           |
| <b>Composite outcome</b>                        | 4.5                         | 6.5                           |
| Death within 6 months*                          | 3.5                         | 3.9                           |
| Death within 1 year*                            | 5.3                         | 6.4                           |

Results presented as column-%

\* Never: N=186,305; Current: N=135,561

**Table 3.** Unadjusted coefficients<sup>a</sup> and their 95% confidence intervals

| Outcome                        | Mediator                     | c    | 95% CI    | a    | 95% CI    | b    | 95% CI    | c'   | 95% CI     |
|--------------------------------|------------------------------|------|-----------|------|-----------|------|-----------|------|------------|
| 6-month mortality <sup>b</sup> | Surgical site infection      | 0.12 | 0.08-0.15 | 0.37 | 0.33-0.41 | 0.89 | 0.81-0.96 | 0.10 | 0.07-0.14  |
|                                | Cardiovascular complications | 0.12 | 0.08-0.15 | 0.15 | 0.05-0.24 | 2.70 | 2.60-2.80 | 0.11 | 0.07-0.15  |
|                                | Pulmonary complications      | 0.12 | 0.08-0.15 | 0.46 | 0.42-0.51 | 2.90 | 2.85-2.95 | 0.01 | -0.02-0.05 |
|                                | Composite outcome            | 0.12 | 0.08-0.15 | 0.39 | 0.36-0.42 | 2.21 | 2.17-2.25 | 0.02 | -0.02-0.05 |
| 1-year mortality <sup>c</sup>  | Surgical site infection      | 0.20 | 0.17-0.23 | 0.37 | 0.33-0.41 | 0.83 | 0.76-0.89 | 0.19 | 0.16-0.22  |
|                                | Cardiovascular complications | 0.20 | 0.17-0.23 | 0.15 | 0.05-0.24 | 2.42 | 2.32-2.52 | 0.20 | 0.17-0.23  |
|                                | Pulmonary complications      | 0.20 | 0.17-0.23 | 0.46 | 0.42-0.51 | 2.60 | 2.57-2.64 | 0.13 | 0.10-0.17  |
|                                | Composite outcome            | 0.20 | 0.17-0.23 | 0.39 | 0.36-0.42 | 1.91 | 1.88-1.95 | 0.13 | 0.10-0.16  |

c=direct path from smoking to mortality

1  
2  
3 a= path from smoking to complication (SSI, cardiovascular, pulmonary or composite)  
4

5 b= path from complication (SSI etc.) to mortality controlling for smoking  
6

7  
8 c' = path from smoking to mortality controlling for complication (SSI etc.)  
9

10 <sup>a</sup> all coefficients were unstandardized and rounded off to 2-digits after the decimal  
11

12 <sup>b</sup> Variances used to compute standardized coefficients (22): var (Smoking) = 0.975, var (Mortality) = 0.036, var(predicted  
13 Mortality|Smoking') = 3.30, var (SSI) = 0.028, var (predicted SSI|Smoking') = 3.42, var (predicted Mortality|Smoking & SSI'') = 3.32,  
14 var (Cardiovascular) = 0.005, var (predicted Cardiovascular|Smoking') = 3.31, var (predicted Mortality|Smoking & Cardiovascular'') =  
15 3.34, var (Pulmonary) = 0.024, var (predicted Pulmonary|Smoking') = 3.50, var (predicted Mortality|Smoking & Pulmonary'') = 3.49,  
16 var (Composite) = 0.051, var (predicted Composite|Smoking') = 3.44, var (predicted Mortality|Smoking & Composite'') = 3.54  
17  
18  
19  
20  
21  
22

23  
24  
25 <sup>c</sup> Variances used to compute standardized coefficients (22): var (Smoking) = 0.975, var (Mortality) = 0.054, var(predicted  
26 Mortality|Smoking') = 3.33, var (SSI) = 0.028, var (predicted SSI|Smoking') = 3.42, var (predicted Mortality|Smoking & SSI'') = 3.34,  
27 var (Cardiovascular) = 0.005, var (predicted Cardiovascular|Smoking') = 3.31, var (predicted Mortality|Smoking & Cardiovascular'') =  
28 3.36, var (Pulmonary) = 0.024, var (predicted Pulmonary|Smoking') = 3.50, var (predicted Mortality|Smoking & Pulmonary'') = 3.47,  
29 var (Composite) = 0.051, var (predicted Composite|Smoking') = 3.44, var (predicted Mortality|Smoking & Composite'') = 3.49  
30  
31  
32  
33  
34  
35  
36  
37  
38  
39  
40  
41  
42  
43  
44  
45  
46  
47  
48  
49

**Table 4.** Adjusted coefficients<sup>a</sup> and their 95% confidence intervals controlling for confounding

| Outcome                        | Mediator                     | c    | 95% CI    | a    | 95% CI    | b    | 95% CI    | c'   | 95% CI    |
|--------------------------------|------------------------------|------|-----------|------|-----------|------|-----------|------|-----------|
| 6-month mortality <sup>b</sup> | Surgical site infection      | 0.39 | 0.35-0.44 | 0.19 | 0.14-0.24 | 0.45 | 0.37-0.53 | 0.39 | 0.35-0.43 |
|                                | Cardiovascular complications | 0.38 | 0.34-0.42 | 0.19 | 0.08-0.30 | 2.00 | 1.89-2.12 | 0.38 | 0.34-0.42 |
|                                | Pulmonary complications      | 0.38 | 0.34-0.42 | 0.48 | 0.43-0.54 | 2.17 | 2.11-2.23 | 0.32 | 0.27-0.36 |
|                                | Composite outcome            | 0.38 | 0.34-0.42 | 0.29 | 0.25-0.32 | 1.71 | 1.66-1.76 | 0.33 | 0.28-0.37 |
| 1-year mortality <sup>c</sup>  | Surgical site infection      | 0.45 | 0.42-0.49 | 0.19 | 0.14-0.24 | 0.44 | 0.37-0.51 | 0.45 | 0.41-0.48 |
|                                | Cardiovascular complications | 0.44 | 0.40-0.47 | 0.19 | 0.08-0.30 | 1.77 | 1.66-1.88 | 0.44 | 0.40-0.47 |
|                                | Pulmonary complications      | 0.44 | 0.40-0.47 | 0.48 | 0.43-0.54 | 1.90 | 1.85-1.96 | 0.39 | 0.36-0.43 |
|                                | Composite outcome            | 0.44 | 0.40-0.47 | 0.29 | 0.25-0.32 | 1.44 | 1.40-1.48 | 0.40 | 0.36-0.44 |

1  
2  
3 c=direct path from smoking to mortality controlling for age, race/ethnicity, work RVU, surgeon specialty, ASA class, and year

4  
5 a= path from smoking to complication (SSI, cardiovascular, pulmonary or composite) controlling for age, race/ethnicity, work RVU,  
6  
7 surgeon specialty, ASA class, and year

8  
9 b= path from complication (SSI etc.) to mortality controlling for smoking, age, race/ethnicity, work RVU, surgeon specialty, ASA class,  
10  
11 and year

12  
13 c' = path from smoking to mortality controlling for complication (SSI etc.), age, race/ethnicity, work RVU, surgeon specialty, ASA  
14  
15 class, and year  
16  
17

18  
19  
20 <sup>a</sup> all coefficients were unstandardized and were rounded off to 2-digits after the decimal

21  
22 <sup>b</sup> Variances used to compute standardized coefficients (22): var (Smoking) = 0.975, var (Mortality) = 0.036, var(predicted  
23  
24 Mortality|Smoking [SSI]') = 3.44, var(predicted Mortality|Smoking [Cardiovascular, Pulmonary, and Composite]') = 3.43, var (SSI) =  
25  
26 0.028, var (predicted SSI|Smoking') = 3.32, var (predicted Mortality|Smoking & SSI'') = 3.44, var (Cardiovascular) = 0.005, var  
27  
28 (predicted Cardiovascular|Smoking') = 3.33, var (predicted Mortality|Smoking & Cardiovascular'') = 3.45, var (Pulmonary) = 0.024,  
29  
30 var (predicted Pulmonary|Smoking') = 3.52, var (predicted Mortality|Smoking & Pulmonary'') = 3.49, var (Composite) = 0.051, var  
31  
32 (predicted Composite|Smoking') = 3.37, var (predicted Mortality|Smoking & Composite'') = 3.53  
33  
34  
35  
36  
37

38 <sup>c</sup> Variances used to compute standardized coefficients (22): var (Smoking) = 0.975, var (Mortality) = 0.054, var(predicted  
39  
40 Mortality|Smoking [SSI]') = 3.49, var(predicted Mortality|Smoking [Cardiovascular, Pulmonary, and Composite]') = 3.48, var (SSI) =  
41  
42  
43  
44  
45

1  
2  
3 0.028, var (predicted SSI|Smoking') = 3.32, var (predicted Mortality|Smoking & SSI'') = 3.49, var (Cardiovascular) = 0.005, var  
4  
5 (predicted Cardiovascular|Smoking') = 3.33, var (predicted Mortality|Smoking & Cardiovascular'') = 3.49, var (Pulmonary) = 0.024,  
6  
7 var (predicted Pulmonary|Smoking') = 3.52, var (predicted Mortality|Smoking & Pulmonary'') = 3.52, var (Composite) = 0.051, var  
8  
9 (predicted Composite|Smoking') = 3.37, var (predicted Mortality|Smoking & Composite'') = 3.54  
10  
11  
12  
13  
14  
15  
16  
17  
18  
19  
20  
21  
22  
23  
24  
25  
26  
27  
28  
29  
30  
31  
32  
33  
34  
35  
36  
37  
38  
39  
40  
41  
42  
43  
44  
45  
46  
47  
48  
49

For peer review only

1  
2  
3  
4  
5  
6  
7  
8  
9  
10  
11  
12  
13  
14  
15  
16  
17  
18  
19  
20  
21  
22  
23  
24  
25  
26  
27  
28  
29  
30  
31  
32  
33  
34  
35  
36  
37  
38  
39  
40  
41  
42  
43  
44  
45  
46  
47  
48  
49

**Table 5.** Proportion of mediation of smoking to mortality association explained by each complication in unadjusted and adjusted models

| Outcome           | Mediator                     | Proportion Mediation Unadjusted<br>for covariates | Proportion Mediation Adjusted for<br>covariates |
|-------------------|------------------------------|---------------------------------------------------|-------------------------------------------------|
| 6-month mortality | Surgical site infection      | 22.2%                                             | 2.0%                                            |
|                   | Cardiovascular complications | 12.2%                                             | 3.8%                                            |
|                   | Pulmonary complications      | 88.9%                                             | 21.6%                                           |
|                   | Composite outcome            | 86.4%                                             | 15.7%                                           |
| 1-year mortality  | Surgical site infection      | 12.6%                                             | 1.7%                                            |
|                   | Cardiovascular complications | 6.5%                                              | 3.0%                                            |
|                   | Pulmonary complications      | 42.7%                                             | 16.2%                                           |
|                   | Composite outcome            | 40.8%                                             | 11.3%                                           |

Because the proportion mediated is a ratio statistic, its estimated value is sensitive to variation in point estimates of the regression coefficients from which it is derived; it should therefore be interpreted with caution. Coefficient values (magnitude and significance) should be the main proponent in assessing mediation



**Figure 1.** Path diagram of the relations among the three standardized variables and standardized coefficients of paths

Figure legend:

a= regression coefficient for path from smoking to pulmonary complication

b= regression coefficient for path from pulmonary complication to 6-month mortality, controlling for smoking

c'= regression coefficient for path from smoking to 6-month mortality, controlling for pulmonary complication

c= regression coefficient for direct path from smoking to 6-month mortality

Smoking is the independent variable, pulmonary complication the mediator and 6-month mortality dependent variable. a, b, c and c' are coefficients from logistic regression analyses.

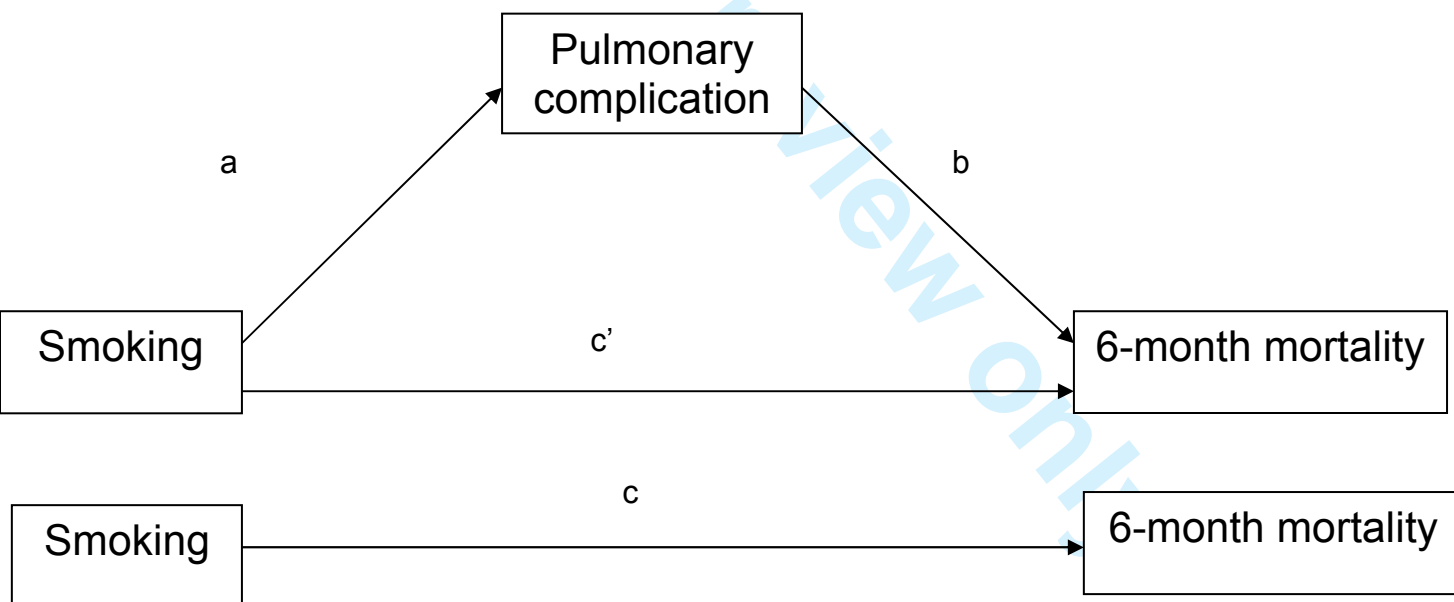

**References:**

1. Mokdad AH, Marks JS, Stroup DF, et al. Actual causes of death in the United States, 2000. *JAMA* 2004;291:1238-1245
2. Arozullah AM, Khuri SF, Henderson WG, et al. Development and validation of a multifactorial risk index for predicting postoperative pneumonia after major noncardiac surgery. *Ann Intern Med* 2001;135:847-857
3. Land T, Warner D, Paskowsky M, et al. Medicaid coverage for tobacco dependence treatments in Massachusetts and associated decreases in smoking prevalence. *PLoS One* 2010;5:e9770
4. CDC. State-Specific Prevalence of Cigarette Smoking and Smokeless Tobacco Use Among Adults --- United States, 2009. *MMWR Morb Mortal Wkly Rep* 2010;59:1400-1406
5. Office of Quality and Performance VHA. Health Behaviors Of Veterans In The VHA: Tobacco Use - 1999 Large Health Survey Of VHA Enrollees. Washington, DC: Veterans Health Administration; 2001
6. Mangram AJ, Horan TC, Pearson ML, et al. Guideline for prevention of surgical site infection, 1999. Hospital Infection Control Practices Advisory Committee. *Infect Control Hosp Epidemiol* 1999;20:250-278
7. Brooks-Brunn JA. Predictors of postoperative pulmonary complications following abdominal surgery. *Chest* 1997;111:564-571
8. Dunn CJ, Goa KL. Enoxaparin. A pharmacoeconomic appraisal of its use in thromboembolic prophylaxis after total hip arthroplasty. *Pharmacoeconomics* 1996;10:179-190
9. Cohen AT, Phillips MJ, Edmondson RA, et al. A dose ranging study to evaluate dermatan sulphate in preventing deep vein thrombosis following total hip arthroplasty. *Thromb Haemost* 1994;72:793-798
10. Kwong LM. Cost-effectiveness of rivaroxaban after total hip or total knee arthroplasty. *Am J Manag Care* 2011;17:S22-26
11. Roos EM, Toksvig-Larsen S. Knee injury and Osteoarthritis Outcome Score (KOOS) - validation and comparison to the WOMAC in total knee replacement. *Health Qual Life Outcomes* 2003;1:17
12. Krych AJ, Horlocker TT, Hebl JR, et al. Contemporary pain management strategies for minimally invasive total knee arthroplasty. *Instr Course Lect* 2010;59:99-109
13. Fuji T, Fujita S, Ujihira T, et al. Dabigatran etexilate prevents venous thromboembolism after total knee arthroplasty in Japanese patients with a safety profile comparable to placebo. *J Arthroplasty* 2010;25:1267-1274
14. Bozic KJ, Vail TP, Pekow PS, et al. Does aspirin have a role in venous thromboembolism prophylaxis in total knee arthroplasty patients? *J Arthroplasty* 2010;25:1053-1060
15. Benyon K, Hill S, Zadurian N, et al. Coping strategies and self-efficacy as predictors of outcome in osteoarthritis: a systematic review. *Musculoskeletal Care* 2010;8:224-236
16. Khuri SF, Daley J, Henderson W, et al. The National Veterans Administration Surgical Risk Study: risk adjustment for the comparative assessment of the quality of surgical care. *J Am Coll Surg* 1995;180:519-531
17. Davis CL, Pierce JR, Henderson W, et al. Assessment of the reliability of data collected for the Department of Veterans Affairs national surgical quality improvement program. *J Am Coll Surg* 2007;204:550-560
18. Somers TJ, Keefe FJ, Godiwala N, et al. Psychosocial factors and the pain experience of osteoarthritis patients: new findings and new directions. *Curr Opin Rheumatol* 2009;21:501-506

19. Daley J, Khuri SF, Henderson W, et al. Risk adjustment of the postoperative morbidity rate for the comparative assessment of the quality of surgical care: results of the National Veterans Affairs Surgical Risk Study. *J Am Coll Surg* 1997;185:328-340
20. Dripps RD, Lamont A, Eckenhoff JE. The role of anesthesia in surgical mortality. *JAMA* 1961;178:261-266
21. Weaver F, Hynes D, Hopkinson W, et al. Preoperative risks and outcomes of hip and knee arthroplasty in the Veterans Health Administration. *J Arthroplasty* 2003;18:693-708
22. Gonzalez Saenz de Tejada M, Escobar A, Herrera C, et al. Patient expectations and health-related quality of life outcomes following total joint replacement. *Value Health* 2010;13:447-454
23. Cornali C, Franzoni S, Di Fazio I, et al. Implementation of guidelines for type 2 diabetes mellitus in a post-acute geriatric setting. *Aging Clin Exp Res* 2009;21:338-343
24. Ashraf MN, Mortasawi A, Grayson AD, et al. Effect of smoking status on mortality and morbidity following coronary artery bypass surgery. *Thorac Cardiovasc Surg* 2004;52:268-273
25. Jones R, Nyawo B, Jamieson S, et al. Current smoking predicts increased operative mortality and morbidity after cardiac surgery in the elderly. *Interact Cardiovasc Thorac Surg* 2011;12:449-453
26. Shi Y, Warner DO. Surgery as a teachable moment for smoking cessation. *Anesthesiology* 2010;112:102-107
27. Warner DO. Helping surgical patients quit smoking: why, when, and how. *Anesth Analg* 2005;101:481-487, table of contents
28. Pacault-Legendre V, Anract P, Mathieu M, et al. Pain after total hip arthroplasty: a psychiatric point of view. *Int Orthop* 2009;33:65-69
29. Lucas B. Total hip and total knee replacement: preoperative nursing management. *Br J Nurs* 2008;17:1346-1351
30. Hirose J, Mizuta H, Ide J, et al. Evaluation of estimation of physiologic ability and surgical stress (E-PASS) to predict the postoperative risk for hip fracture in elder patients. *Arch Orthop Trauma Surg* 2008;128:1447-1452
31. Dosanjh S, Matta JM, Bhandari M. The final straw: a qualitative study to explore patient decisions to undergo total hip arthroplasty. *Arch Orthop Trauma Surg* 2009;129:719-727
32. Tumialan LM, Gluf WM. Progressive vertebral body osteolysis after cervical disc arthroplasty. *Spine (Phila Pa 1976)* 2011;36:E973-978
33. McGraw IW, Jameson SS, Kumar CS. Mid-term results of the Moje Hallux MP joint replacement. *Foot Ankle Int* 2010;31:592-599
34. Rose B, Bartlett W, Blunn G, et al. Custom-made lateral femoral condyle replacement for traumatic bone loss: a case report. *Knee* 2010;17:417-420
35. Hogan MV, Grant RE, Lee L, Jr. Analgesia for total hip and knee arthroplasty: a review of lumbar plexus, femoral, and sciatic nerve blocks. *Am J Orthop (Belle Mead NJ)* 2009;38:E129-133
36. Cavaliere CM, Chung KC. A systematic review of total wrist arthroplasty compared with total wrist arthrodesis for rheumatoid arthritis. *Plast Reconstr Surg* 2008;122:813-825
37. Tsui BC, Bury J, Bouliane M, et al. Cervical epidural analgesia via a thoracic approach using nerve-stimulation guidance in adult patients undergoing total shoulder replacement surgery. *Acta Anaesthesiol Scand* 2007;51:255-260
38. Gellert C, Schottker B, Holleczer B, et al. Using rate advancement periods for communicating the benefits of quitting smoking to older smokers. *Tob Control* 2012

- 1  
2  
3 39. Bueno de Mesquita HB, Maisonneuve P, Moerman CJ, et al. Life-time history of  
4 smoking and exocrine carcinoma of the pancreas: a population-based case-control study in The  
5 Netherlands. *Int J Cancer* 1991;49:816-822  
6  
7 40. Dimick JB, Chen SL, Taheri PA, et al. Hospital costs associated with surgical  
8 complications: a report from the private-sector National Surgical Quality Improvement Program.  
9 *J Am Coll Surg* 2004;199:531-537  
10  
11  
12  
13  
14  
15  
16  
17  
18  
19  
20  
21  
22  
23  
24  
25  
26  
27  
28  
29  
30  
31  
32  
33  
34  
35  
36  
37  
38  
39  
40  
41  
42  
43  
44  
45  
46  
47  
48  
49  
50  
51  
52  
53  
54  
55  
56  
57  
58  
59  
60

For peer review only

1  
2  
3  
4  
5  
6  
7  
8  
9 **Mediation of Smoking-Associated Postoperative Mortality by perioperative complications**  
10 **in Smokers-Veterans undergoing Elective Surgery: ~~An analysis of Data from~~ Veterans**  
11 **Affairs Surgical Quality Improvement Program (VASQIP)**

12  
13  
14 Jasvinder A. Singh<sup>1,4</sup>, Mary Hawn<sup>1,2</sup>, Elizabeth J. Campagna<sup>5,8</sup>, William G. Henderson<sup>5</sup>, Joshua  
15 Richman<sup>1</sup>, Thomas K. Houston<sup>6,7</sup>

16  
17 From the <sup>1</sup>Medicine Service, Birmingham VA Medical Center and Department of Medicine,  
18 University of Alabama at Birmingham, Birmingham, AL; <sup>2</sup>Center for Surgical Medical Acute Care  
19 Research and Transitions, Birmingham VA Medical Center, Birmingham, AL; <sup>3</sup>Division of  
20 Epidemiology, School of Public Health, University of Alabama at Birmingham, Birmingham, AL;  
21 <sup>4</sup>Department of Orthopedic Surgery, Mayo Clinic College of Medicine, Rochester, MN;  
22 <sup>5</sup>Colorado Health Outcomes Program, University of Colorado Denver, Aurora, CO; <sup>6</sup>Center for  
23 Health Quality Outcomes and Economic Research, Bedford VA Medical Center, Bedford, MA;  
24 <sup>7</sup>Department of Quantitative Health Sciences, University of Massachusetts Medical School,  
25 Worcester, MA; <sup>8</sup>VA Medical Center, Denver, CO

26  
27 **Grant support:** This material is the result of work supported with VA IIR IAB 06-038-2 and the  
28 use and resources of facilities at the Department of Veterans Affairs Medical Centers at  
29 Bedford, Massachusetts; Birmingham, Alabama; and Denver, Colorado. Dr. Singh is supported  
30 by research grants from the National Institute of Aging, National Cancer Institute and Agency for  
31 Health Quality and Research Center for Education and Research on Therapeutics (CERTs).

32  
33 **Financial Conflict:** There are no financial conflicts related to this work. Dr. Singh has received  
34 investigator-initiated research grants from Allergan, Takeda and Savient; consultant fees from  
35 URL pharmaceuticals, Takeda, Savient, Ardea, Allergan and Novartis; and is a member of the  
36 executive of OMERACT, an organization that develops outcome measures in rheumatology and  
37 receives arms-length funding from 36 companies. Dr. Singh is also a member of the American  
38 College of Rheumatology's Guidelines Subcommittee of the Quality of Care Committee and  
39  
40  
41  
42  
43  
44  
45  
46  
47  
48  
49  
50  
51  
52

1  
2  
3  
4  
5  
6  
7  
8  
9  
10  
11  
12  
13  
14  
15  
16  
17  
18  
19  
20  
21  
22  
23  
24  
25  
26  
27  
28  
29  
30  
31  
32  
33  
34  
35  
36  
37  
38  
39  
40  
41  
42  
43  
44  
45  
46  
47  
48  
49  
50  
51  
52  
53  
54  
55  
56  
57  
58  
59  
60

Veterans Affairs Rheumatology Field Advisory Committee. Other authors declare no conflict of interest.

Each author certifies that his or her institution has approved the human protocol for this investigation and that all investigations were conducted in conformity with ethical principles of research.

**Correspondence:** Jasvinder A. Singh, MBBS, MPH, University of Alabama at Birmingham, Faculty Office Tower 805B, 510 20<sup>th</sup> Street S, Birmingham, AL 35294.

Phone: 205-996-5885 Fax : 205-996-9685 E-mail: [Jasvinder.md@gmail.com](mailto:Jasvinder.md@gmail.com)

"The views expressed in this article are those of the authors and do not necessarily reflect the position or policy of the Department of Veterans Affairs or the United States government."

Word Count: 3,024

Abstract: 246

**Keywords:** Smoking, elective surgery, mortality, mediator, Veterans

**Running Title:** Mediators of Mortality in Smokers Undergoing Arthroplasty

## Article Summary

### 1) Article Focus -

- We aimed to examine whether smoking-associated post-operative mortality is mediated through smoking-associated postoperative complications in patients who are current smokers at the time of their surgery.
- We hypothesized that specific smoking-associated complications (SSI, pulmonary, cardiovascular) in the post-operative period in current smokers, mediate smoking-related 6-month and 1-year mortality.

### 2) Key Messages -

- Pulmonary complications, followed by cardiovascular and surgical site infection complications were mediators of smoking-associated 6-month and 1-year mortality after elective knee or hip replacement surgery.
- Preoperative smoking counseling and implementation of smoking cessation programs should be done prior to an elective surgery such as knee/hip replacement.
- Early treatment of complications that mediate postoperative 1-year mortality may help to reduce risk of dying after an elective surgery.

### 3) Strengths and Limitations -

#### Strengths:

- Use of prospectively, collected national data in the largest integrated health care system in the U.S.

- Outcomes and complications had been defined using standardized definitions and validated by nurse abstractors

Limitations:

- Findings may not be generalizable to women and non-veteran U.S. population, since our sample included primarily men, representative of U.S. veterans.
- The current smoker variable is collected retrospectively from medical records, which could lead to misclassification bias and underestimation of the association.
- Smoking status may change over time and the current study could not take that into account, since ongoing smoking status data are not available.
- Mediation assumes no unmeasured variables and despite accounting for all the important variables to the best of our capability with the given data, residual confounding is possible.

□



**ABSTRACT**

**Objective:** To assess the mediation of smoking-associated post-operative mortality by post-operative complications.

**Design:** Observational Cohort Study

Formatted: Font: Not Bold

**Setting:** Using data from the Veterans Affairs Surgical Quality Improvement Program, a quality assurance program for major surgical procedures in the VA healthcare system, we assessed the association of current smoking at the time of the surgery with 6-month and 1-year mortality.

**Primary and Secondary Outcome Measures:** Using mediation analyses, we calculated the relative contribution of each smoking-associated complication to smoking-associated postoperative mortality, both unadjusted and adjusted for age, race/ethnicity, work relative value unit of the operation, surgeon specialty, American Society of Anesthesiologists class, and year of surgery. Smoking-associated complications included surgical site infection, cardiovascular complications (myocardial infarction, cardiac arrest, and/or stroke), and pulmonary complications (pneumonia, failure to wean, and/or re-intubation).

**Results:** There were 186,632 never-smokers and 135,741 current smokers. The association of smoking and mortality was mediated by smoking-related complications with varying effects. In unadjusted analyses, the proportions of mediation of smoking to 6-month mortality explained by the complications were as follows: SSI, 22%; cardiovascular complications, 12%; and pulmonary complications, 89%. In adjusted analyses, the percents mediated by each complication were as follows: SSI, 2%; cardiovascular complications, 4%; and pulmonary complications, 22%. In adjusted analyses for 1-year mortality, respective percents mediated were 2%, 3% and 16%.

**Conclusions:** Pulmonary complications, followed by cardiovascular and SSI complications were mediators of smoking-associated 6-month and 1-year mortality. Interventions targeting smoking cessation and prevention and early treatment of pulmonary complications has the likelihood of reducing post-operative mortality after elective surgery.

1  
2  
3  
4  
5  
6  
7  
8  
9  
10  
11  
12  
13  
14  
15  
16  
17  
18  
19  
20  
21  
22  
23  
24  
25  
26  
27  
28  
29  
30  
31  
32  
33  
34  
35  
36  
37  
38  
39  
40  
41  
42  
43  
44  
45  
46  
47  
48  
49  
50  
51  
52  
53  
54  
55  
56  
57  
58  
59  
60

**Trial Registration:** Not applicable, not an interventional study

For peer review only

## INTRODUCTION

Smoking is the leading cause of preventable death in the U.S. (1, 2). While the prevalence of smoking in the U.S. has decreased (3), smoking is still highly prevalent with a recent national survey showing between 10-26% prevalence in most U.S. states (4). The prevalence of smoking in veterans using Veterans Affairs (VA) health care is even higher, at 30% (5). Smoking has detrimental effects on cardiovascular and lung health, and is linked to increased risk of surgical complications. Specifically, smokers undergoing surgery have a higher risk of several postoperative complications including wound infections, pneumonia, and mortality (6, 7). Smoking is a modifiable risk factor (8-10). Preoperative smoking cessation is associated with decreased postoperative wound complications and total complications (11).

While smoking-related postoperative morbidity is important, smoking is also associated with increased post-operative mortality (12-14). There are several proposed mechanisms of increased mortality in the perioperative period for smokers, including higher risk of cardiac (12, 13) and pulmonary complications (14). To our knowledge, no previous studies have assessed to what degree the increased smoking-associated postoperative mortality is mediated by specific complications associated with smoking. This has important consequences for designing interventions to improve outcomes. If the effect of smoking on mortality were direct (direct toxic effects on health; low likelihood), then the only effective method to improve smoking-related outcomes would be smoking cessation. Alternatively, to the extent that smoking is~~Alternatively, if smoking were~~ related to mortality through an increase in pulmonary complications among smokers, then the effect of smoking is said to act through the mediating factor of pulmonary complications. Such a result would suggest that direct actions~~interventions~~ to reduce pulmonary complications among smokers may be an additional strategy ~~alternative method~~ for improving the mortality outcome.

We have recently demonstrated that smoking was associated with both postoperative surgical site infections (SSI) and pulmonary complications in a large cohort of veterans who

1  
2  
3  
4  
5  
6  
7  
8  
9  
10  
11  
12  
13  
14  
15  
16  
17  
18  
19  
20  
21  
22  
23  
24  
25  
26  
27  
28  
29  
30  
31  
32  
33  
34  
35  
36  
37  
38  
39  
40  
41  
42  
43  
44  
45  
46  
47  
48  
49  
50  
51  
52  
53  
54  
55  
56  
57  
58  
59  
60

underwent surgery in VA medical facilities and that mortality was also increased in this cohort (15). These data are collected prospectively and systematically as part of the National VA Surgical Quality Improvement Program (VASQIP) (16) (17).

In this study we aimed to examine whether smoking-associated post-operative mortality is mediated through smoking-associated postoperative complications in patients who are current smokers at the time of their surgery. Conceptually, “mediation” occurs when a cause and its effect are linked through an intervening factor that is part of the causal chain of events (18). As an example, this study explored the link between smoking and postoperative morbidity and mortality. We hypothesized that specific smoking-associated complications (SSI, pulmonary, cardiovascular) in the post-operative period in current smokers, mediate smoking-related 6-month and 1-year mortality. This was done in two steps: we first established a link between smoking and adverse outcomes, and we then investigated and quantified the proportion of the observed association appearing to act through a particular and plausible mediator, i.e., once a link was established between smoking and adverse outcomes, we investigated whether the effect was directly due to smoking itself or whether it acts through a mediator, in this case, smoking-associated complication.

## METHODS

### Ethical Approval, Study Funding and Data sharing

The study was approved by the Institutional Review Boards at the VA Medical Centers (Birmingham, AL, Bedford, MA, Boston, MA and Seattle, WA), the University of Colorado, and by the Surgical Quality Data Use Group of VA Patient Care Services in VA Central Office, Washington, DC (as needed for studies using data from this dataset). All analyses used SAS version 9.2 (SAS Institute Inc., Cary, North Carolina). This material is the result of work supported with VA Investigator-Initiated Research (IIR) IAB 06-038-2. Additionally, Dr. Singh's time was protected by research grants from the National Institute of Aging, National Cancer Institute and Agency for Health Quality and Research Center for Education and Research on Therapeutics (CERTs). We are committed to sharing the data with colleagues after an ethics committee approval and in accordance with VA data privacy and data security rules.

### Study Sample

We used data from the VASQIP, a system-wide initiative instituted in 1994 to improve the quality of surgical care through prospective collection and reporting of comparative risk-adjusted post-operative outcomes of major surgeries requiring general, spinal, or epidural anesthesia(19). The abstracted data are >99% complete with >96% inter-observer agreement(17). We requested all cases in major procedure groups defined by CPT codes within each of the 8 surgical subspecialties (general, vascular, orthopedic, thoracic, otolaryngology, urology, neurosurgery, and plastic surgery) for the years 2002-2008. This produced a sample of roughly 60-70% of all non-cardiac operations in the VASQIP database for those years (n=507,545). We selected the first operation for each patient greater than or equal to 19 years of age, resulting in 412,511 unique patients. We excluded 17,202 patients coded as having emergency operations, since we wanted to focus on elective surgeries. We also excluded 1,515 patients who were coded as a current smoker but who had 0 pack-years (an

1  
2  
3  
4  
5  
6  
7  
8  
9  
10  
11  
12  
13  
14  
15  
16  
17  
18  
19  
20  
21  
22  
23  
24  
25  
26  
27  
28  
29  
30  
31  
32  
33  
34  
35  
36  
37  
38  
39  
40  
41  
42  
43  
44  
45  
46  
47  
48  
49  
50  
51  
52  
53  
54  
55  
56  
57  
58  
59  
60

inconsistency) or were missing the current smoker variable. Since our focus was current smoking, we excluded 71,421 prior smokers leaving a total of 322,373 patients for analysis.

#### Independent Measure: Current Smoking

Smoking status was assessed using two variables. Patients are queried at the time of elective surgery if they have smoked cigarettes in the year prior to admission (yes/no) and regarding amount of smoking (pack years = the number of packs smoked per day multiplied by the number of years the patient smoked), documented in patients' medical records. Never-smokers were patients who had no smoking in the prior year and zero (or missing) pack years. Current smokers were those who responded "yes" to smoking in the year prior to admission and had pack years not equal to zero.

#### Dependent Measure: Mortality

Mortality was assessed at 6-months and at 1-year. The VASQIP nurses collect 30-day postoperative vital status for all patients assessed in the VASQIP program. Once every 6 months, the VASQIP database is passed through the VA administrative vitals file to obtain data on long-term postoperative mortality beyond 30 days after surgery.

#### Mediation Variables: 30-day Outcomes for Complications

All complications of interest were assessed 30-days after elective surgery. Specifically, the outcomes included: (1) SSI; (2) Cardiovascular complication, defined as occurrence of myocardial infarction (MI), cardiac arrest, and/or stroke; (3) Pulmonary complication, defined as occurrence of pneumonia, failure to wean, and/or re-intubation; and (4) Overall composite outcome, defined as the occurrence of SSI, cardiovascular and/or pulmonary complication. All outcomes have standard definitions in VASQIP and are extracted and validated for each patient

1  
2  
3  
4  
5  
6  
7  
8  
9 by an independent nurse abstractor at each VA site for the 30-day period after the surgery (16,  
10 17).

#### 11 12 13 14 Covariates: Patient, Surgeon, and Procedural Characteristics

15 Patient characteristics including age, race/ethnicity, American Society of  
16 Anesthesiologists (ASA) class, year of surgery, work relative value unit (RVU) for the operation,  
17 and wound classification were extracted. ASA class is a validated measure of peri-operative  
18 mortality and immediate post-operative morbidity, categorized into five classifications (20, 21)  
19 (class I, normal healthy patient; class II, patient with mild systemic disease (with no functional  
20 limitation); class III, patient with severe systemic disease (with some functional limitation); class  
21 IV, patient with severe systemic disease that is a constant threat to life; class V, moribund  
22 patient). Work RVU (a measure of procedure duration and complexity) and surgeon  
23 subspecialty were collected by chart review. These variables were chosen based on previous  
24 literature of association of these factors with mortality or because they represented the  
25 complexity of the surgery.  
26  
27  
28  
29  
30  
31  
32  
33  
34  
35

#### 36 Statistical Analyses

37 Summary statistics were calculated for clinical and demographic characteristics.  
38 Mediation analysis was done without and with controlling for covariates that could potentially  
39 confound the relationship. Univariable and multivariable-adjusted logistic regression analyses  
40 were used to compute coefficients for association of smoking and mortality, smoking and major  
41 complications (SSI, pulmonary, cardiovascular or composite) and major complications and  
42 mortality, to assess mediation effect of complications on the relationship between smoking and  
43 mortality. In multivariable analyses, we adjusted for age, race/ethnicity, work RVU, surgeon  
44 specialty, ASA class, and year at each step of the mediation analysis. Wound classification was  
45 additionally adjusted for in the model when assessing the mediation effect of SSI.  
46  
47  
48  
49  
50  
51  
52  
53

1  
2  
3  
4  
5  
6  
7  
8  
9  
10  
11  
12  
13  
14  
15  
16  
17  
18  
19  
20  
21  
22  
23  
24  
25  
26  
27  
28  
29  
30  
31  
32  
33  
34  
35  
36  
37  
38  
39  
40  
41  
42  
43  
44  
45  
46  
47  
48  
49  
50  
51  
52  
53  
54  
55  
56  
57  
58  
59  
60

The conceptual framework of “mediation” indicates that mediation occurs when a cause and its effect are linked through an intervening factor that is part of the causal chain of events (18). The classic exposition of statistical mediation analysis was given by Baron and Kenny in 1986 (18). The mediating relationship was conceived in causal terms, so while it was recognized that the statistical models cannot establish causality, the causal interpretation of the posited relationships must be plausible. The precondition was that the independent variable (smoking) is statistically significantly associated with the dependent variable (e.g. 6-month mortality). The total effect of smoking on mortality was denoted by the path “c” in figure 1 representing the effect-association of smoking on mortality without adjustment for the potential mediator. Baron and Kenny outlined three steps for a formal mediation analysis using regression, which can be explained with reference to figure 1 in the context of the relationship between smoking and 6-month mortality with the putative mediating effect of pulmonary complications. The first step was to establish that there is a significant association between the independent variable (smoking) and the potential mediator (pulmonary complications) corresponding to the path coefficient “a” in figure 1. The second step was to establish that the potential mediator (pulmonary complications) is associated with the dependent variable (6-month mortality), while controlling for the independent variable (smoking), corresponding to the path coefficient “b”. Last, when controlling for the mediator (pulmonary complications) the “direct effect” of the independent variable (smoking) on the dependent variable (6-month mortality) corresponds to the coefficient “c” “. We interpret the ‘direct effect’ to be the ‘lifetime exposure of smoking. Less technically, if 1) smoking was related to both pulmonary complications and mortality, 2) pulmonary complications were related to mortality, and 3) the magnitude of the relationship between smoking and mortality decreased by a statistically significant amount the relationship between smoking and mortality was significantly smaller when controlling for pulmonary complications, then there was a significant amount of mediation by pulmonary complications.

Formatted: Font: (Default) Arial, 11 pt



1  
2  
3  
4  
5  
6  
7  
8  
9           Arithmetically, the indirect effect is equal to the product of coefficients  $a*b$  and the total  
10 effect ( $c$ ), is equal to the indirect effect ( $a*b$ ) plus the remaining direct effect ( $c'$ ), thus:  $c=a*b +c'$ ,  
11 so  $c'=c-a*b$ . Clearly, as the indirect effect through the mediator gets larger, the residual direct  
12 effect must decrease, implying that a larger part of the effect is via the mediator. The more the  
13 direct effect is diminished, the greater part of the effect is mediated. The more the  
14 direct effect is diminished, the greater part of the effect is mediated.

15  
16  
17           The statistical significance of the mediated, or indirect, effect was determined by testing  
18 whether the product  $a*b$  is statistically different from zero. The standard approximate test was  
19 due to the work of Sobel, and presented by Baron and Kenny (18). Subsequent work, notably  
20 by Shrout and Bolger (23) note that the Sobel test can be overly conservative for small samples  
21 but also that this ceases to be a concern when the sample size is greater than 1,000. The much  
22 larger sample size of this study suggested that the Sobel test was adequate in this context.

23  
24  
25           To evaluate the importance of the mediation it can be informative to calculate the  
26 proportion of the effect due to mediation as the indirect effect divided by the total effect as  $a*b/c$ .  
27 In our work, the independent, dependent, and mediator variable were all dichotomous. In this  
28 context where logistic regression is used  $a*b+c'$  may only approximate  $c$ , so we followed the  
29 methods of MacKinnon and Dwyer (22) and calculated the proportion of the effect due to  
30 mediation using coefficients standardized to the same scale. We present only the  
31 unstandardized coefficients because they are more interpretable within the context of the  
32 individual regression models.

33  
34  
35           ~~In our work, the independent, dependent, and mediator variable were all dichotomous.~~  
36 ~~For this situation, logistic regression was used and coefficients must then be standardized to~~  
37 ~~the same scale prior to comparison and statistical testing as presented by MacKinnon and~~  
38 ~~Dwyer (22). When using logistic regression, unlike in multiple regression,  $a*b+c'$  only~~  
39 ~~approximated  $c$ . In this work, we reported the proportion of the effect mediated as~~  
40  ~~$(a*b)/(a*b+c')$ , or the indirect effect divided by the total effect. The statistical significance of the~~  
41 ~~mediated, or indirect, effect was determined by testing whether the product  $a*b$  is statistically~~

1  
2  
3  
4  
5  
6  
7  
8  
9  
10  
11  
12  
13  
14  
15  
16  
17  
18  
19  
20  
21  
22  
23  
24  
25  
26  
27  
28  
29  
30  
31  
32  
33  
34  
35  
36  
37  
38  
39  
40  
41  
42  
43  
44  
45  
46  
47  
48  
49  
50  
51  
52  
53  
54  
55  
56  
57  
58  
59  
60

different from zero. The standard approximate test was due to the work of Sobel, and presented by Baron and Kenny (18). Subsequent work, notably by Shrout and Bolger,(23) note that the Sobel test can be overly conservative for small samples but also that this ceases to be a concern when the sample size is greater than 1,000. The much larger sample size of this study suggested that the Sobel test was adequate in this context.

For peer review only

## RESULTS

There were 186,632 never-smokers and 135,741 current smokers. The mean age was 63 years for never smokers and 58 years for current smokers. 95% were men and 63% were White (race/ethnicity missing in 19%) (Table 1). Diabetes was less common among current smokers compared to never smokers, but COPD, dyspnea, and alcohol consumption were more common. Other characteristics were similar between the two groups (Table 1). Crude estimates of outcomes by smoking status us shown in Table 2.

Formatted: Font: Bold

Formatted: Font: Bold

### Mediation Analyses for 6-month and 1-year mortality

Unstandardized coefficients were calculated without (unadjusted; Table 32) and with (adjusted; Table 43) potential confounders using regression analyses. Variances for computing standardized coefficients are footnoted. The unadjusted coefficients were highest between smoking and pulmonary complications (coefficient a =0.46), and between pulmonary complication and 6-month mortality, controlling for smoking was (coefficient b =2.90) among all complications (Table 32); similar observations were made for pulmonary complications and 1-year mortality. In general unadjusted coefficients were higher than adjusted coefficients.

Table 43 provides coefficients for the mediation analyses controlling for confounding from age, race/ethnicity, work RVU, surgeon specialty, ASA class, and year for 6-month and 1-year mortality. Mediation analysis for SSI additionally controlled for wound classification. The coefficients for the path from smoking to 6- and 12-month mortality when considering the mediation factor of SSI were 0.39 and 0.45 (coefficient c). Again as an example, the coefficient between smoking and pulmonary complications was 0.48 (coefficient a), between pulmonary complication and 6-month mortality controlling for smoking was 2.17 (coefficient b), and that between smoking and 6-month mortality controlling for pulmonary complication was 0.32 (coefficient c'). The association between smoking and 6-month mortality was significantly mediated by pulmonary complication (22%) (Table 5). For 6-month mortality, adjusted

1  
2  
3  
4  
5  
6  
7  
8  
9  
10  
11  
12  
13  
14  
15  
16  
17  
18  
19  
20  
21  
22  
23  
24  
25  
26  
27  
28  
29  
30  
31  
32  
33  
34  
35  
36  
37  
38  
39  
40  
41  
42  
43  
44  
45  
46  
47  
48  
49  
50  
51  
52  
53  
54  
55  
56  
57  
58  
59  
60

coefficients between smoking and complications were highest for pulmonary complications (0.48), followed by composite outcome (0.29), SSI (0.19) and cardiovascular complications (0.19) (coefficient a). Adjusted coefficients were highest for pulmonary followed by cardiovascular, composite and SSI complications for association with 6-month mortality, controlling for smoking (coefficient b). The proportion of mediation of smoking to 6-month mortality explained by the complications in adjusted analyses was 16% for the composite outcome, while the proportions were lower for SSI (2%) and cardiovascular complications (4%)

(Table 54).

Similar patterns were noted for mediation of smoking and 1-year mortality for adjusted coefficients (Table 43). In the adjusted models, the proportion of mediation of smoking to 1-year mortality explained by the complications in adjusted analyses was 16% for pulmonary complications, 11% for composite complications, 3% for cardiovascular complications and 2% for SSI (Table 54).

## DISCUSSION

In this analysis of prospectively collected data in a national sample of non-cardiac elective surgeries at VA facilities, we found that increased 6-month and 1-year smoking-associated mortality was mediated by pulmonary complications and to a lesser extent cardiovascular complications and surgical site infections. Not unexpectedly, estimates of the proportion of smoking-related mortality mediated by each peri-operative complication were all numerically larger for the proportion of smoking mortality association mediated by these peri-operative complications was greater for 6-month mortality compared to that for 1-year mortality, although this was not tested statistically. The proportion mediated by complications also attenuated significantly between adjusted and unadjusted analyses, as expected. These observations are novel and have important implications for targeting interventions for patients undergoing elective surgery.

That smoking is associated with increased mortality after elective surgical procedures is well known (24, 25). Preoperative period has been proposed a "window of opportunity" and a "teachable moment" to help patients quit smoking (26, 27). This study examined a critical question, i.e., is this increased mortality mediated by the postoperative complications seen more commonly in smokers than in non-smokers? The evidence presented here confirms that these postoperative complications mediated significant proportion of increased mortality risk, and that this varied by the type of complication. Pulmonary complications explained the most variation in this increased risk, as compared to cardiovascular complications or surgical site infections. Our findings suggest pulmonary complications are far more important contributors to the smoking-mortality association than the cardiovascular complications. There has been significant emphasis placed on pre-operative cardiac risk assessment for non-cardiac surgery (28). Consensus statements on cardiac risk stratification including who should undergo screening and revascularization and management of patients with implanted cardiac stents have been developed and widely disseminated (29-31). Perhaps this focus and attention on

1  
2  
3  
4  
5  
6  
7  
8  
9  
10  
11  
12  
13  
14  
15  
16  
17  
18  
19  
20  
21  
22  
23  
24  
25  
26  
27  
28  
29  
30  
31  
32  
33  
34  
35  
36  
37  
38  
39  
40  
41  
42  
43  
44  
45  
46  
47  
48  
49  
50  
51  
52  
53  
54  
55  
56  
57  
58  
59  
60

identifying and intervening on cardiac risk has mitigated the association effects of smoking related cardiovascular events on-with mortality, in both smokers and never smokers. Similar attention has not been given to pre-operative risk stratification for post-operative pulmonary events. These events occur more frequently than cardiovascular events and lead to substantial post-operative mortality (32-37).

Perioperative complications associated with smoking mediated a high proportion of the association of smoking and mortality before adjustment. But the proportion mediation was greatly attenuated after adjustment. This suggests that a major part of the mediation effect was contained in variables we adjusted for, including ASA class. In addition, some of the association of smoking and subsequent mortality is related to lifetime exposure to smoking (direct effect), and not the direct association effect of smoking on perioperative complications (indirect effect through pulmonary complications). This may be related to occurrence of major lifetime complications from smoking, for example, COPD, coronary artery disease, various cancers and stroke, which can all contribute to postoperative mortality.

We did find that even after adjustment, smoking-related pulmonary complications mediated over 15% of the association of smoking and postoperative mortality. Thus, part of the effect-association of smoking on mortality is due to a lifetime exposure-effect, as shown previously (38, 39), and part due to immediate complications, such as pulmonary complications. The first goal should always be to get smokers to quit prior to surgery. But acknowledging that not all smokers will quit prior to their surgery, the surgical staff should be especially vigilant of pulmonary complications, as our data clearly demonstrates them to mediate mortality. Careful monitoring of adherence to pneumonia prevention guidelines in postoperative period as well as early diagnosis and management may lead to reduction in mortality. Far more importantly, preventive pre-operative evaluation and optimization of pulmonary health in addition to implementation of preoperative smoking cessation programs in patients undergoing elective surgery have the likelihood of reducing the increased mortality risk. Consensus statements on

1  
2  
3  
4  
5  
6  
7  
8  
9 pulmonary risk assessment and patients who should be referred for intervention are strongly  
10 needed.

11  
12 We found that the attributable risk of SSI to smoking-related mortality was lower than  
13 that for pulmonary and cardiovascular complications. SSIs constitute the most common  
14 infection, accounting for 38% of all infections (6). In addition, SSIs are associated with  
15 significant increases in hospital stay,(6) making them one of the most costly post-operative  
16 complications.(6, 40). SSIs are the third most common nosocomial infection overall,  
17 representing 14% of all hospital acquired infections. Thus even though their contribution to  
18 mortality is lower, their common prevalence and the ability to institute measures to prevent them  
19 make them suitable targets for interventions.  
20  
21

22  
23  
24  
25  
26 The proportion mediated by each of three complications was attenuated by adjustment  
27 for age, race/ethnicity, work RVU, surgeon specialty and ASA class, indicating that these factors  
28 may have contributed to mortality outcome. In addition, other factors that we did not measure in  
29 this study such as other smoking-related diseases such as cancer, COPD etc. may have  
30 contributed. Additionally, as is common in observational studies such as ours, smoking status  
31 may be a marker for unmeasured variables that may be causal. Thus, smoking status should  
32 alert clinicians to other factors, which may need to be addressed preoperatively.  
33  
34  
35  
36  
37

38 Our study has several limitations. It is possible that findings may not be generalizable to  
39 women, since our sample included primarily men, representative of U.S. veterans. These  
40 findings may not be generalizable to non-veterans; however, it is unlikely that the pathway of  
41 smoking-associated mortality risk differs by veteran status. The current smoker variable in  
42 VASQIP is collected retrospectively from medical records, which could lead to misclassification  
43 bias and underestimation of the association. Thus, these results are conservative estimates of  
44 these associations. Another limitation is that smoking status may change over time and current  
45 study design and analyses did not take that into account. Mediation assumes no unmeasured  
46 variables; this is of course not true as we can never account for all omitted factors. We  
47  
48  
49  
50  
51  
52  
53  
54

1  
2  
3  
4  
5  
6  
7  
8  
9  
10  
11  
12  
13  
14  
15  
16  
17  
18  
19  
20  
21  
22  
23  
24  
25  
26  
27  
28  
29  
30  
31  
32  
33  
34  
35  
36  
37  
38  
39  
40  
41  
42  
43  
44  
45  
46  
47  
48  
49  
50  
51  
52  
53  
54  
55  
56  
57  
58  
59  
60

accounted for all the important variables to the best of our capability with the given data.

Another limitation of the mediation analysis is that the proportion mediated is influenced by sample size, coefficient estimates, and distribution of the outcomes/predictors and since our variables were dichotomous and we have small standardized coefficient estimates.<sup>1</sup> Cause of death was not available to us, so these details could not be provided for smokers and never smokers.

In conclusion, this study found that a high proportion of association between smoking and post-operative 6-month and 1-year mortality is mediated by postoperative complications, especially pulmonary complications. Future efforts at reducing post-operative mortality should be aimed at pre-operative risk identification and intervention. Efforts directed at pulmonary risk stratification, surveillance and prevention for pulmonary and other complications in smokers undergoing elective surgery may likely impact mortality in current smokers undergoing elective surgical procedures.



1  
2  
3  
4  
5  
6  
7  
8  
9  
10  
11  
12  
13  
14  
15  
16  
17  
18  
19  
20  
21  
22  
23  
24  
25  
26  
27  
28  
29  
30  
31  
32  
33  
34  
35  
36  
37  
38  
39  
40  
41  
42  
43  
44  
45  
46  
47  
48  
49  
50  
51  
52  
53  
54  
55  
56  
57  
58  
59  
60

#### ACKNOWLEDGMENT

The authors would like to acknowledge The VA Surgical Quality Data Use Group (SQDUG) for its role as scientific advisors and for the critical review of data use and analysis presented in this manuscript.

For peer review only

## TABLES AND FIGURES

**Table 1.** Patient characteristics by smoking status\* (Column percents unless noted otherwise)

| Characteristic                | Never<br>Smoked<br>(n=186,632) | Current<br>Smoker<br>(n=135,741) |
|-------------------------------|--------------------------------|----------------------------------|
| Smoking Pack Years, mean (SD) | N/A                            | 48.8 (32.6)                      |
| Demographics                  |                                |                                  |
| Age, mean (SD)                | 63.1 (13.7)                    | 57.6 (11.0)                      |
| Sex                           | Female                         | 5.1%                             |
|                               | Male                           | 94.9%                            |
| Race/Ethnicity                | White                          | 62.3%                            |
|                               | Black                          | 12.3%                            |
|                               | Hispanic                       | 5.3%                             |
|                               | Other/Unknown                  | 20.2%                            |
| Comorbidities                 |                                |                                  |
| Diabetes                      | 20.2%                          | 14.6%                            |
| Congestive heart failure      | 1.2%                           | 1.0%                             |
| History of severe COPD        | 7.0%                           | 18.4%                            |
| Dyspnea                       | 8.4%                           | 15.4%                            |
| Chronic Corticosteroid use    | 1.7%                           | 1.7%                             |
| Renal failure/Dialysis        | 0.7%                           | 0.5%                             |
| CVA/Stroke                    | 5.9%                           | 6.6%                             |
| Transient ischemic attacks    | 2.9%                           | 3.6%                             |

|                                        |                     |            |       |
|----------------------------------------|---------------------|------------|-------|
| Functional health status               | Independent         | 93.5%      | 94.8% |
|                                        | Partially dependent | 5.2%       | 4.6%  |
|                                        | Totally dependent   | 1.3%       | 0.6%  |
| >10% loss body weight in past 6 months |                     | 1.8%       | 3.4%  |
| Disseminated cancer                    |                     | 1.0%       | 1.3%  |
| Open wound/wound infection             |                     | 3.2%       | 4.3%  |
| DNR status                             |                     | 0.9%       | 0.6%  |
| Alcohol > 2 drinks/day                 |                     | 4.3%       | 14.6% |
| Operative Characteristics              |                     |            |       |
| Anesthesia technique                   | General             | 79.4%      | 84.8% |
|                                        | Epidural/Spinal     | 15.6%      | 10.9% |
|                                        | Local/Monitored     | 5.1%       | 4.2%  |
| ASA classification                     | 1                   | 4.4%       | 1.6%  |
|                                        | 2                   | 35.8%      | 33.4% |
|                                        | 3                   | 53.8%      | 58.2% |
|                                        | 4/5                 | 6.1%       | 6.8%  |
|                                        | Admission status    | Outpatient | 51.0% |
|                                        | Inpatient           | 49.0%      | 52.9% |
| Specialty of Surgeon                   | General Surgery     | 39.3%      | 35.3% |
|                                        | Neurosurgery        | 5.4%       | 7.9%  |
|                                        | Orthopedic Surgery  | 29.6%      | 21.9% |
|                                        | Otolaryngology      | 1.1%       | 1.3%  |
|                                        | Plastic Surgery     | 0.6%       | 0.6%  |
|                                        | Thoracic Surgery    | 1.7%       | 5.6%  |
|                                        | Urology             | 15.6%      | 13.1% |

|                                  |                    |            |            |
|----------------------------------|--------------------|------------|------------|
|                                  | Cardiovascular     | 6.3%       | 13.8%      |
|                                  | Surgery            |            |            |
|                                  | Other              | 0.4%       | 0.4%       |
| Wound Classification             | Clean              | 70.0%      | 70.8%      |
|                                  | Clean/contaminated | 27.3%      | 26.2%      |
|                                  | Contaminated       | 1.6%       | 1.6%       |
|                                  | Infected           | 1.2%       | 1.4%       |
| Work RVU (mean, SD)              |                    | 14.1 (7.1) | 14.8 (7.8) |
| Operation time, hours (mean, SD) |                    | 1.9 (1.4)  | 2.1 (1.6)  |

**\*All p-value are less than  $< 0.001$  with the exception of steroid use, for which was 0.581**

N/A, not applicable; SD, standard deviation; RUV, relative value units; ASA, American Society of Anesthesiologists; DNR, Do not resuscitate; COPD, chronic obstructive pulmonary disease; CVA, cerebrovascular accident

Formatted: Font: Bold

Formatted: Font: Bold

Table 2. Frequency of Outcomes by Smoking status

| <b>Postoperative Outcome</b>                    | <b>Never Smoked</b><br><b>(n=186,632)</b> | <b>Current Smoker</b><br><b>(n=135,741)</b> |
|-------------------------------------------------|-------------------------------------------|---------------------------------------------|
| <b>Surgical site infection</b>                  | <b>2.4</b>                                | <b>3.4</b>                                  |
| <b>Vascular complications</b>                   | <b>0.5</b>                                | <b>0.5</b>                                  |
| Cerebral vascular accident/Stroke               | 0.2                                       | 0.3                                         |
| Myocardial infarction                           | 0.3                                       | 0.3                                         |
| <b>Pulmonary complications</b>                  | <b>2.0</b>                                | <b>3.1</b>                                  |
| Reintubation for respiratory or cardiac failure | 0.9                                       | 1.6                                         |
| Pneumonia                                       | 1.2                                       | 1.9                                         |
| Failure to wean > 48 hours                      | 0.8                                       | 1.4                                         |
| <b>Composite outcome</b>                        | <b>4.5</b>                                | <b>6.5</b>                                  |
| Death within 6 months*                          | 3.5                                       | 3.9                                         |
| Death within 1 year*                            | 5.3                                       | 6.4                                         |

Results presented as column-%

\* Never: N=186,305; Current: N=135,561

Formatted: Line spacing: Double

Formatted Table

Formatted: Line spacing: Double

Formatted: Line spacing: Double

Formatted: Line spacing: Double

Formatted: Font: Bold

Formatted: Line spacing: Double

**Table 32.** Unadjusted coefficients<sup>a</sup> and their 95% confidence intervals

| Outcome                        | Mediator                     | c    | 95% CI    | a    | 95% CI    | b    | 95% CI    | c'   | 95% CI     |
|--------------------------------|------------------------------|------|-----------|------|-----------|------|-----------|------|------------|
| 6-month mortality <sup>b</sup> | Surgical site infection      | 0.12 | 0.08-0.15 | 0.37 | 0.33-0.41 | 0.89 | 0.81-0.96 | 0.10 | 0.07-0.14  |
|                                | Cardiovascular complications | 0.12 | 0.08-0.15 | 0.15 | 0.05-0.24 | 2.70 | 2.60-2.80 | 0.11 | 0.07-0.15  |
|                                | Pulmonary complications      | 0.12 | 0.08-0.15 | 0.46 | 0.42-0.51 | 2.90 | 2.85-2.95 | 0.01 | -0.02-0.05 |
|                                | Composite outcome            | 0.12 | 0.08-0.15 | 0.39 | 0.36-0.42 | 2.21 | 2.17-2.25 | 0.02 | -0.02-0.05 |
| 1-year mortality <sup>c</sup>  | Surgical site infection      | 0.20 | 0.17-0.23 | 0.37 | 0.33-0.41 | 0.83 | 0.76-0.89 | 0.19 | 0.16-0.22  |
|                                | Cardiovascular complications | 0.20 | 0.17-0.23 | 0.15 | 0.05-0.24 | 2.42 | 2.32-2.52 | 0.20 | 0.17-0.23  |
|                                | Pulmonary complications      | 0.20 | 0.17-0.23 | 0.46 | 0.42-0.51 | 2.60 | 2.57-2.64 | 0.13 | 0.10-0.17  |
|                                | Composite outcome            | 0.20 | 0.17-0.23 | 0.39 | 0.36-0.42 | 1.91 | 1.88-1.95 | 0.13 | 0.10-0.16  |

1  
2  
3  
4  
5  
6  
7  
8  
9 c=direct path from smoking to mortality

10 a= path from smoking to complication (SSI, cardiovascular, pulmonary or composite)

11  
12 b= path from complication (SSI etc.) to mortality controlling for smoking

13  
14 c' = path from smoking to mortality controlling for complication (SSI etc.)

15  
16 <sup>a</sup> all coefficients were unstandardized and rounded off to 2-digits after the decimal

17  
18 <sup>b</sup> Variances used to compute standardized coefficients (22): var (Smoking) = 0.975, var (Mortality) = 0.036, var(predicted  
19 Mortality|Smoking') = 3.30, var (SSI) = 0.028, var (predicted SSI|Smoking') = 3.42, var (predicted Mortality|Smoking & SSI'') = 3.32,  
20 var (Cardiovascular) = 0.005, var (predicted Cardiovascular|Smoking') = 3.31, var (predicted Mortality|Smoking & Cardiovascular'') =  
21 3.34, var (Pulmonary) = 0.024, var (predicted Pulmonary|Smoking') = 3.50, var (predicted Mortality|Smoking & Pulmonary'') = 3.49,  
22 var (Composite) = 0.051, var (predicted Composite|Smoking') = 3.44, var (predicted Mortality|Smoking & Composite'') = 3.54

23  
24  
25  
26  
27  
28 <sup>c</sup> Variances used to compute standardized coefficients (22): var (Smoking) = 0.975, var (Mortality) = 0.054, var(predicted  
29 Mortality|Smoking') = 3.33, var (SSI) = 0.028, var (predicted SSI|Smoking') = 3.42, var (predicted Mortality|Smoking & SSI'') = 3.34,  
30 var (Cardiovascular) = 0.005, var (predicted Cardiovascular|Smoking') = 3.31, var (predicted Mortality|Smoking & Cardiovascular'') =  
31 3.36, var (Pulmonary) = 0.024, var (predicted Pulmonary|Smoking') = 3.50, var (predicted Mortality|Smoking & Pulmonary'') = 3.47,  
32 var (Composite) = 0.051, var (predicted Composite|Smoking') = 3.44, var (predicted Mortality|Smoking & Composite'') = 3.49  
33  
34  
35  
36  
37  
38  
39  
40  
41  
42  
43  
44  
45  
46  
47  
48  
49

**Table 43.** Adjusted coefficients<sup>a</sup> and their 95% confidence intervals controlling for confounding

| Outcome                        | Mediator                     | c    | 95% CI    | a    | 95% CI    | b    | 95% CI    | c'   | 95% CI    |
|--------------------------------|------------------------------|------|-----------|------|-----------|------|-----------|------|-----------|
| 6-month mortality <sup>b</sup> | Surgical site infection      | 0.39 | 0.35-0.44 | 0.19 | 0.14-0.24 | 0.45 | 0.37-0.53 | 0.39 | 0.35-0.43 |
|                                | Cardiovascular complications | 0.38 | 0.34-0.42 | 0.19 | 0.08-0.30 | 2.00 | 1.89-2.12 | 0.38 | 0.34-0.42 |
|                                | Pulmonary complications      | 0.38 | 0.34-0.42 | 0.48 | 0.43-0.54 | 2.17 | 2.11-2.23 | 0.32 | 0.27-0.36 |
|                                | Composite outcome            | 0.38 | 0.34-0.42 | 0.29 | 0.25-0.32 | 1.71 | 1.66-1.76 | 0.33 | 0.28-0.37 |
| 1-year mortality <sup>c</sup>  | Surgical site infection      | 0.45 | 0.42-0.49 | 0.19 | 0.14-0.24 | 0.44 | 0.37-0.51 | 0.45 | 0.41-0.48 |
|                                | Cardiovascular complications | 0.44 | 0.40-0.47 | 0.19 | 0.08-0.30 | 1.77 | 1.66-1.88 | 0.44 | 0.40-0.47 |
|                                | Pulmonary complications      | 0.44 | 0.40-0.47 | 0.48 | 0.43-0.54 | 1.90 | 1.85-1.96 | 0.39 | 0.36-0.43 |
|                                | Composite outcome            | 0.44 | 0.40-0.47 | 0.29 | 0.25-0.32 | 1.44 | 1.40-1.48 | 0.40 | 0.36-0.44 |



1  
2  
3  
4  
5  
6  
7  
8  
9 c=direct path from smoking to mortality controlling for age, race/ethnicity, work RVU, surgeon specialty, ASA class, and year

10 a= path from smoking to complication (SSI, cardiovascular, pulmonary or composite) controlling for age, race/ethnicity, work RVU,  
11 surgeon specialty, ASA class, and year

12 b= path from complication (SSI etc.) to mortality controlling for smoking, age, race/ethnicity, work RVU, surgeon specialty, ASA class,  
13 and year

14 c' = path from smoking to mortality controlling for complication (SSI etc.), age, race/ethnicity, work RVU, surgeon specialty, ASA  
15 class, and year

16  
17  
18  
19  
20  
21  
22  
23 <sup>a</sup> all coefficients were unstandardized and were rounded off to 2-digits after the decimal

24  
25 <sup>b</sup> Variances used to compute standardized coefficients (22): var (Smoking) = 0.975, var (Mortality) = 0.036, var(predicted  
26 Mortality|Smoking [SSI]) = 3.44, var(predicted Mortality|Smoking [Cardiovascular, Pulmonary, and Composite]) = 3.43, var (SSI) =  
27 0.028, var (predicted SSI|Smoking) = 3.32, var (predicted Mortality|Smoking & SSI) = 3.44, var (Cardiovascular) = 0.005, var  
28 (predicted Cardiovascular|Smoking) = 3.33, var (predicted Mortality|Smoking & Cardiovascular) = 3.45, var (Pulmonary) = 0.024,  
29 var (predicted Pulmonary|Smoking) = 3.52, var (predicted Mortality|Smoking & Pulmonary) = 3.49, var (Composite) = 0.051, var  
30 (predicted Composite|Smoking) = 3.37, var (predicted Mortality|Smoking & Composite) = 3.53  
31  
32  
33  
34  
35  
36  
37  
38  
39  
40  
41  
42  
43  
44  
45  
46  
47  
48  
49

1  
2  
3  
4  
5  
6  
7  
8  
9  
10  
11  
12  
13  
14  
15  
16  
17  
18  
19  
20  
21  
22  
23  
24  
25  
26  
27  
28  
29  
30  
31  
32  
33  
34  
35  
36  
37  
38  
39  
40  
41  
42  
43  
44  
45  
46  
47  
48  
49

° Variances used to compute standardized coefficients (22): var (Smoking) = 0.975, var (Mortality) = 0.054, var(predicted Mortality|Smoking [SSI]') = 3.49, var(predicted Mortality|Smoking [Cardiovascular, Pulmonary, and Composite]') = 3.48, var (SSI) = 0.028, var (predicted SSI|Smoking') = 3.32, var (predicted Mortality|Smoking & SSI'') = 3.49, var (Cardiovascular) = 0.005, var (predicted Cardiovascular|Smoking') = 3.33, var (predicted Mortality|Smoking & Cardiovascular'') = 3.49, var (Pulmonary) = 0.024, var (predicted Pulmonary|Smoking') = 3.52, var (predicted Mortality|Smoking & Pulmonary'') = 3.52, var (Composite) = 0.051, var (predicted Composite|Smoking') = 3.37, var (predicted Mortality|Smoking & Composite'') = 3.54

For peer review only

**Table 54.** Proportion of mediation of smoking to mortality association explained by each complication in unadjusted and adjusted models

| Outcome           | Mediator                     | Proportion Mediation Unadjusted<br>for covariates | Proportion Mediation Adjusted for<br>covariates |
|-------------------|------------------------------|---------------------------------------------------|-------------------------------------------------|
| 6-month mortality | Surgical site infection      | 22.2%                                             | 2.0%                                            |
|                   | Cardiovascular complications | 12.2%                                             | 3.8%                                            |
|                   | Pulmonary complications      | 88.9%                                             | 21.6%                                           |
|                   | Composite outcome            | 86.4%                                             | 15.7%                                           |
| 1-year mortality  | Surgical site infection      | 12.6%                                             | 1.7%                                            |
|                   | Cardiovascular complications | 6.5%                                              | 3.0%                                            |
|                   | Pulmonary complications      | 42.7%                                             | 16.2%                                           |
|                   | Composite outcome            | 40.8%                                             | 11.3%                                           |

Because the proportion mediated is a ratio statistic, its estimated value is sensitive to variation in point estimates of the regression coefficients from which it is derived; it should therefore be interpreted with caution.~~The proportion mediated has been shown to be~~

1  
2  
3  
4  
5  
6  
7  
8  
9  
10  
11  
12  
13  
14  
15  
16  
17  
18  
19  
20  
21  
22  
23  
24  
25  
26  
27  
28  
29  
30  
31  
32  
33  
34  
35  
36  
37  
38  
39  
40  
41  
42  
43  
44  
45  
46  
47  
48  
49

~~unstable and should be interpreted with caution.~~ Coefficient values (magnitude and significance) should be the main proponent in assessing mediation

For peer review only

**Figure 1.** Path diagram of the relations among the three standardized variables and standardized coefficients of paths

Figure legend:

a= regression coefficient for path from smoking to pulmonary complication

b= regression coefficient for path from pulmonary complication to 6-month mortality, controlling for smoking

c'= regression coefficient for path from smoking to 6-month mortality, controlling for pulmonary complication

c= regression coefficient for direct path from smoking to 6-month mortality

Smoking is the independent variable, pulmonary complication the mediator and 6-month mortality dependent variable. a, b, c and c' are coefficients from logistic regression analyses.

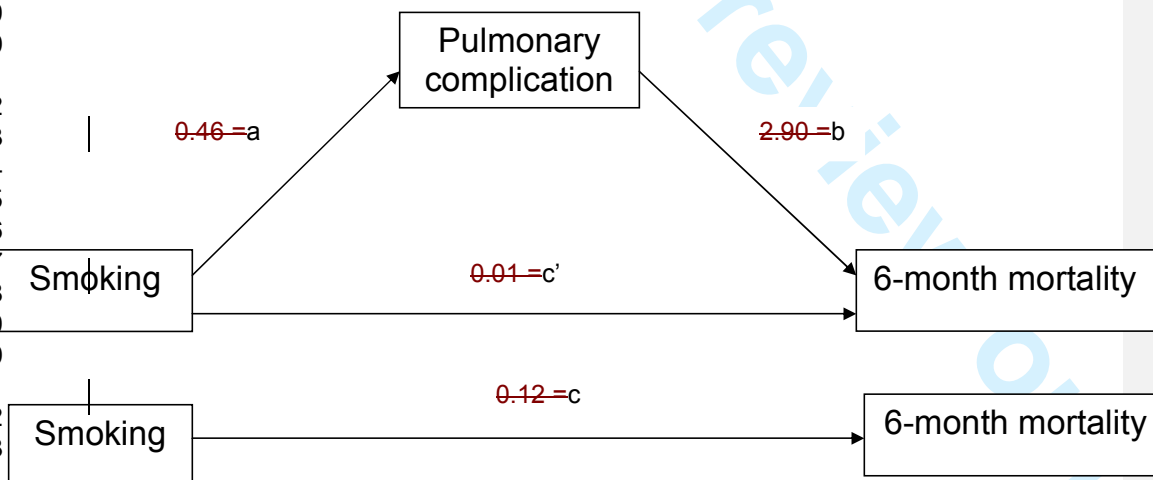

1  
2  
3  
4  
5  
6  
7  
8  
9  
10  
11  
12  
13  
14  
15  
16  
17  
18  
19  
20  
21  
22  
23  
24  
25  
26  
27  
28  
29  
30  
31  
32  
33  
34  
35  
36  
37  
38  
39  
40  
41  
42  
43  
44  
45  
46  
47  
48  
49  
50  
51  
52  
53  
54  
55  
56  
57  
58  
59  
60**References:**

1. Mokdad AH, Marks JS, Stroup DF, et al. Actual causes of death in the United States, 2000. *JAMA* 2004;291:1238-1245
2. Arozullah AM, Khuri SF, Henderson WG, et al. Development and validation of a multifactorial risk index for predicting postoperative pneumonia after major noncardiac surgery. *Ann Intern Med* 2001;135:847-857
3. Land T, Warner D, Paskowsky M, et al. Medicaid coverage for tobacco dependence treatments in Massachusetts and associated decreases in smoking prevalence. *PLoS One* 2010;5:e9770
4. CDC. State-Specific Prevalence of Cigarette Smoking and Smokeless Tobacco Use Among Adults --- United States, 2009. *MMWR Morb Mortal Wkly Rep* 2010;59:1400-1406
5. Office of Quality and Performance VHA. Health Behaviors Of Veterans In The VHA: Tobacco Use - 1999 Large Health Survey Of VHA Enrollees. Washington, DC: Veterans Health Administration; 2001
6. Mangram AJ, Horan TC, Pearson ML, et al. Guideline for prevention of surgical site infection, 1999. Hospital Infection Control Practices Advisory Committee. *Infect Control Hosp Epidemiol* 1999;20:250-278
7. Brooks-Brunn JA. Predictors of postoperative pulmonary complications following abdominal surgery. *Chest* 1997;111:564-571
8. Dunn CJ, Goa KL. Enoxaparin. A pharmacoeconomic appraisal of its use in thromboembolic prophylaxis after total hip arthroplasty. *Pharmacoeconomics* 1996;10:179-190
9. Cohen AT, Phillips MJ, Edmondson RA, et al. A dose ranging study to evaluate dermatan sulphate in preventing deep vein thrombosis following total hip arthroplasty. *Thromb Haemost* 1994;72:793-798
10. Kwong LM. Cost-effectiveness of rivaroxaban after total hip or total knee arthroplasty. *Am J Manag Care* 2011;17:S22-26
11. Roos EM, Toksvig-Larsen S. Knee injury and Osteoarthritis Outcome Score (KOOS) - validation and comparison to the WOMAC in total knee replacement. *Health Qual Life Outcomes* 2003;1:17
12. Krych AJ, Horlocker TT, Hebl JR, et al. Contemporary pain management strategies for minimally invasive total knee arthroplasty. *Instr Course Lect* 2010;59:99-109
13. Fuji T, Fujita S, Ujihira T, et al. Dabigatran etexilate prevents venous thromboembolism after total knee arthroplasty in Japanese patients with a safety profile comparable to placebo. *J Arthroplasty* 2010;25:1267-1274
14. Bozic KJ, Vail TP, Pekow PS, et al. Does aspirin have a role in venous thromboembolism prophylaxis in total knee arthroplasty patients? *J Arthroplasty* 2010;25:1053-1060
15. Benyon K, Hill S, Zadurian N, et al. Coping strategies and self-efficacy as predictors of outcome in osteoarthritis: a systematic review. *Musculoskeletal Care* 2010;8:224-236
16. Khuri SF, Daley J, Henderson W, et al. The National Veterans Administration Surgical Risk Study: risk adjustment for the comparative assessment of the quality of surgical care. *J Am Coll Surg* 1995;180:519-531
17. Davis CL, Pierce JR, Henderson W, et al. Assessment of the reliability of data collected for the Department of Veterans Affairs national surgical quality improvement program. *J Am Coll Surg* 2007;204:550-560
18. Somers TJ, Keefe FJ, Godiwala N, et al. Psychosocial factors and the pain experience of osteoarthritis patients: new findings and new directions. *Curr Opin Rheumatol* 2009;21:501-506

19. Daley J, Khuri SF, Henderson W, et al. Risk adjustment of the postoperative morbidity rate for the comparative assessment of the quality of surgical care: results of the National Veterans Affairs Surgical Risk Study. *J Am Coll Surg* 1997;185:328-340
20. Dripps RD, Lamont A, Eckenhoff JE. The role of anesthesia in surgical mortality. *JAMA* 1961;178:261-266
21. Weaver F, Hynes D, Hopkinson W, et al. Preoperative risks and outcomes of hip and knee arthroplasty in the Veterans Health Administration. *J Arthroplasty* 2003;18:693-708
22. Gonzalez Saenz de Tejada M, Escobar A, Herrera C, et al. Patient expectations and health-related quality of life outcomes following total joint replacement. *Value Health* 2010;13:447-454
23. Cornali C, Franzoni S, Di Fazio I, et al. Implementation of guidelines for type 2 diabetes mellitus in a post-acute geriatric setting. *Aging Clin Exp Res* 2009;21:338-343
24. Ashraf MN, Mortasawi A, Grayson AD, et al. Effect of smoking status on mortality and morbidity following coronary artery bypass surgery. *Thorac Cardiovasc Surg* 2004;52:268-273
25. Jones R, Nyawo B, Jamieson S, et al. Current smoking predicts increased operative mortality and morbidity after cardiac surgery in the elderly. *Interact Cardiovasc Thorac Surg* 2011;12:449-453
26. Shi Y, Warner DO. Surgery as a teachable moment for smoking cessation. *Anesthesiology* 2010;112:102-107
27. Warner DO. Helping surgical patients quit smoking: why, when, and how. *Anesth Analg* 2005;101:481-487, table of contents
28. Pacault-Legendre V, Anract P, Mathieu M, et al. Pain after total hip arthroplasty: a psychiatric point of view. *Int Orthop* 2009;33:65-69
29. Lucas B. Total hip and total knee replacement: preoperative nursing management. *Br J Nurs* 2008;17:1346-1351
30. Hirose J, Mizuta H, Ide J, et al. Evaluation of estimation of physiologic ability and surgical stress (E-PASS) to predict the postoperative risk for hip fracture in elder patients. *Arch Orthop Trauma Surg* 2008;128:1447-1452
31. Dosanjh S, Matta JM, Bhandari M. The final straw: a qualitative study to explore patient decisions to undergo total hip arthroplasty. *Arch Orthop Trauma Surg* 2009;129:719-727
32. Tumialan LM, Gluf WM. Progressive vertebral body osteolysis after cervical disc arthroplasty. *Spine (Phila Pa 1976)* 2011;36:E973-978
33. McGraw IW, Jameson SS, Kumar CS. Mid-term results of the Moje Hallux MP joint replacement. *Foot Ankle Int* 2010;31:592-599
34. Rose B, Bartlett W, Blunn G, et al. Custom-made lateral femoral condyle replacement for traumatic bone loss: a case report. *Knee* 2010;17:417-420
35. Hogan MV, Grant RE, Lee L, Jr. Analgesia for total hip and knee arthroplasty: a review of lumbar plexus, femoral, and sciatic nerve blocks. *Am J Orthop (Belle Mead NJ)* 2009;38:E129-133
36. Cavaliere CM, Chung KC. A systematic review of total wrist arthroplasty compared with total wrist arthrodesis for rheumatoid arthritis. *Plast Reconstr Surg* 2008;122:813-825
37. Tsui BC, Bury J, Bouliane M, et al. Cervical epidural analgesia via a thoracic approach using nerve-stimulation guidance in adult patients undergoing total shoulder replacement surgery. *Acta Anaesthesiol Scand* 2007;51:255-260
38. Gellert C, Schottker B, Holleczer B, et al. Using rate advancement periods for communicating the benefits of quitting smoking to older smokers. *Tob Control* 2012

1  
2  
3  
4  
5  
6  
7  
8  
9  
10  
11  
12  
13  
14  
15  
16  
17  
18  
19  
20  
21  
22  
23  
24  
25  
26  
27  
28  
29  
30  
31  
32  
33  
34  
35  
36  
37  
38  
39  
40  
41  
42  
43  
44  
45  
46  
47  
48  
49  
50  
51  
52  
53  
54  
55  
56  
57  
58  
59  
60

39. Bueno de Mesquita HB, Maisonneuve P, Moerman CJ, et al. Life-time history of smoking and exocrine carcinoma of the pancreas: a population-based case-control study in The Netherlands. *Int J Cancer* 1991;49:816-822

40. Dimick JB, Chen SL, Taheri PA, et al. Hospital costs associated with surgical complications: a report from the private-sector National Surgical Quality Improvement Program. *J Am Coll Surg* 2004;199:531-537

For peer review only
